# Supplementary material for: To what degree the geometry and kinematics of accretionary wedges in analogue experiments is dependent on material properties
Source: Copernicus journal article supplement (doi:10.5194/se-2018-45), 2018-07-03

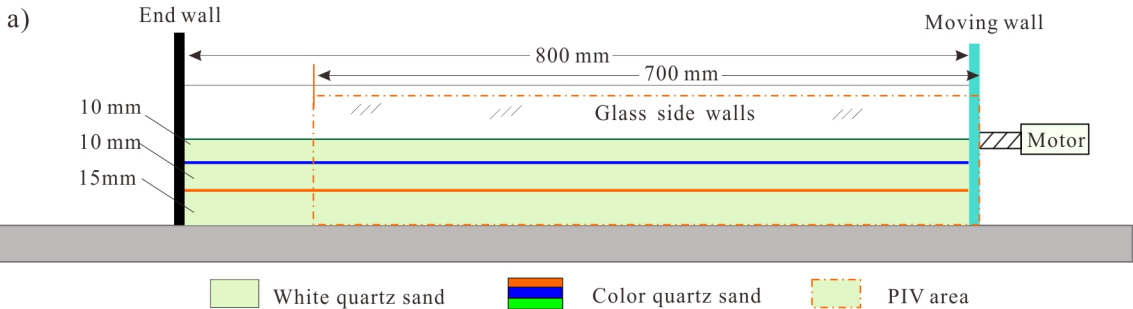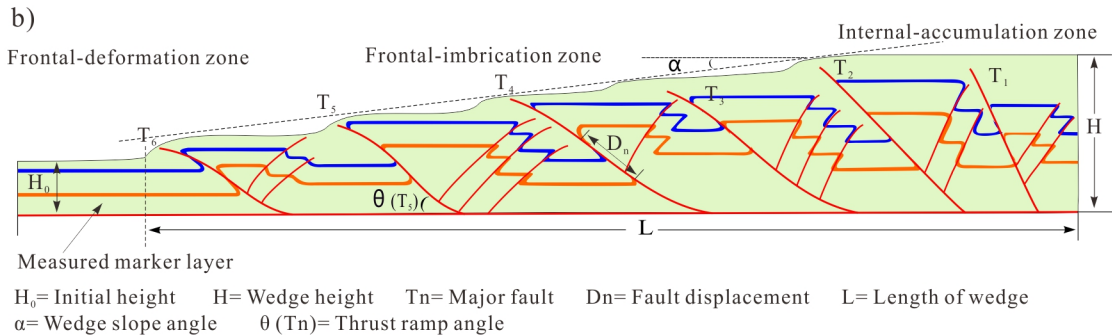

a) 15 mm

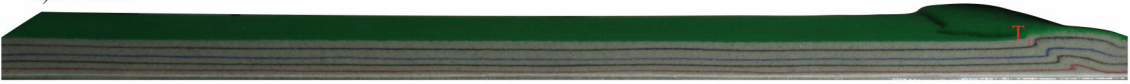

b) 65 mm

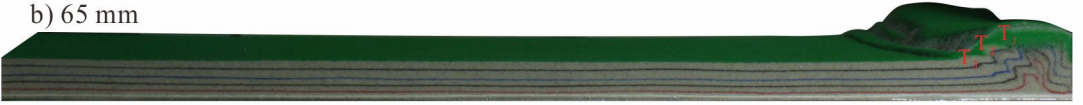

c) 90 mm

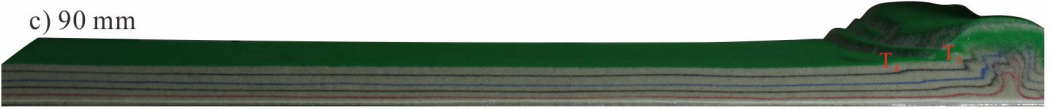

d) 135 mm

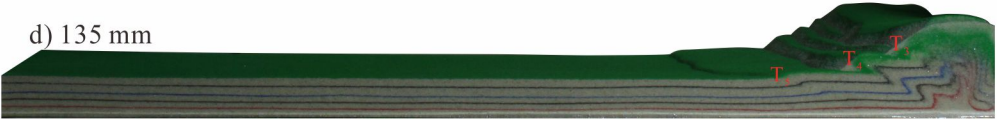

e) 190 mm

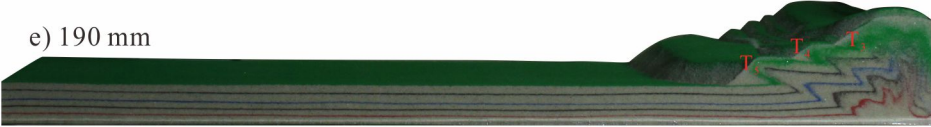

f) 235 mm

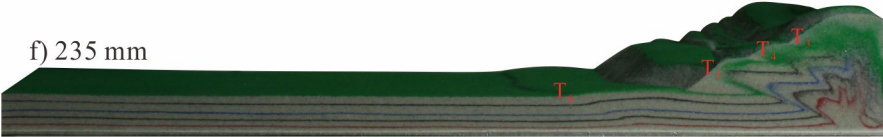

g) 275 mm

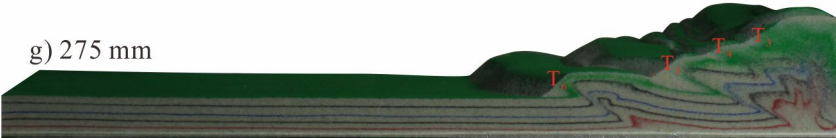

h) 320 mm

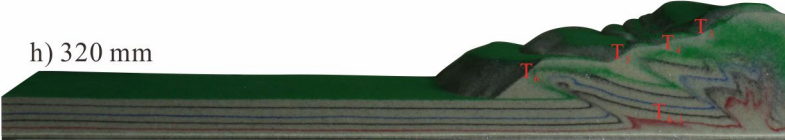

i) 400 mm

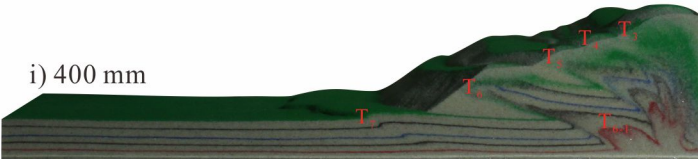

j) Interpretation

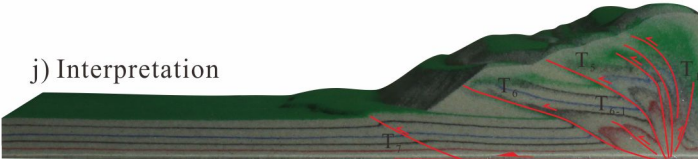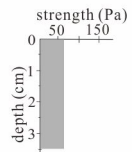

0 5 10 cm

Setup 1: Quartz sand (0.3~0.45mm)

a) 10 mm

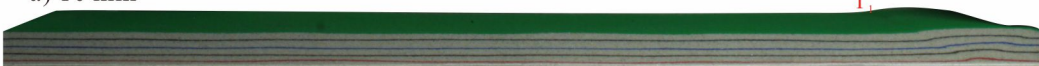

b) 45 mm

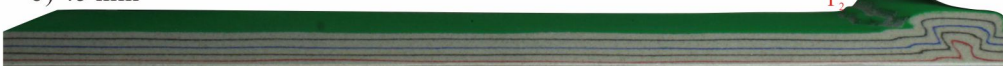

c) 75 mm

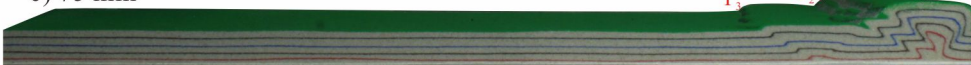

d) 145 mm

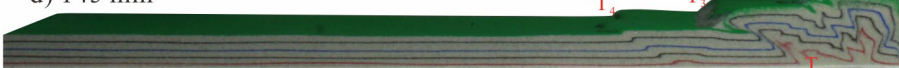

e) 180 mm

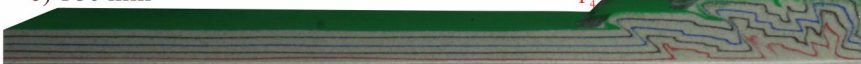

f) 250 mm

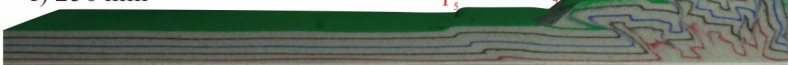

g) 300 mm

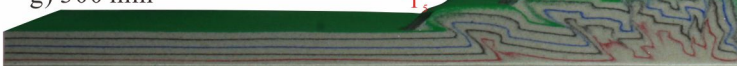

h) 380 mm

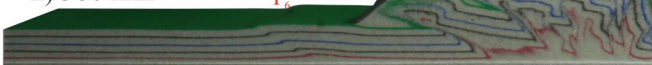

i) 400 mm

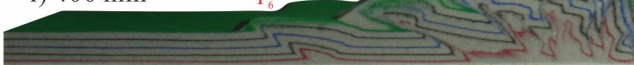

j) Interpretation

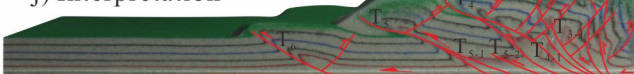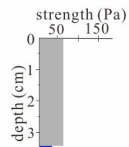

0 5 10 cm

Setup 2: Quartz sand + Glass beads (1 mm)

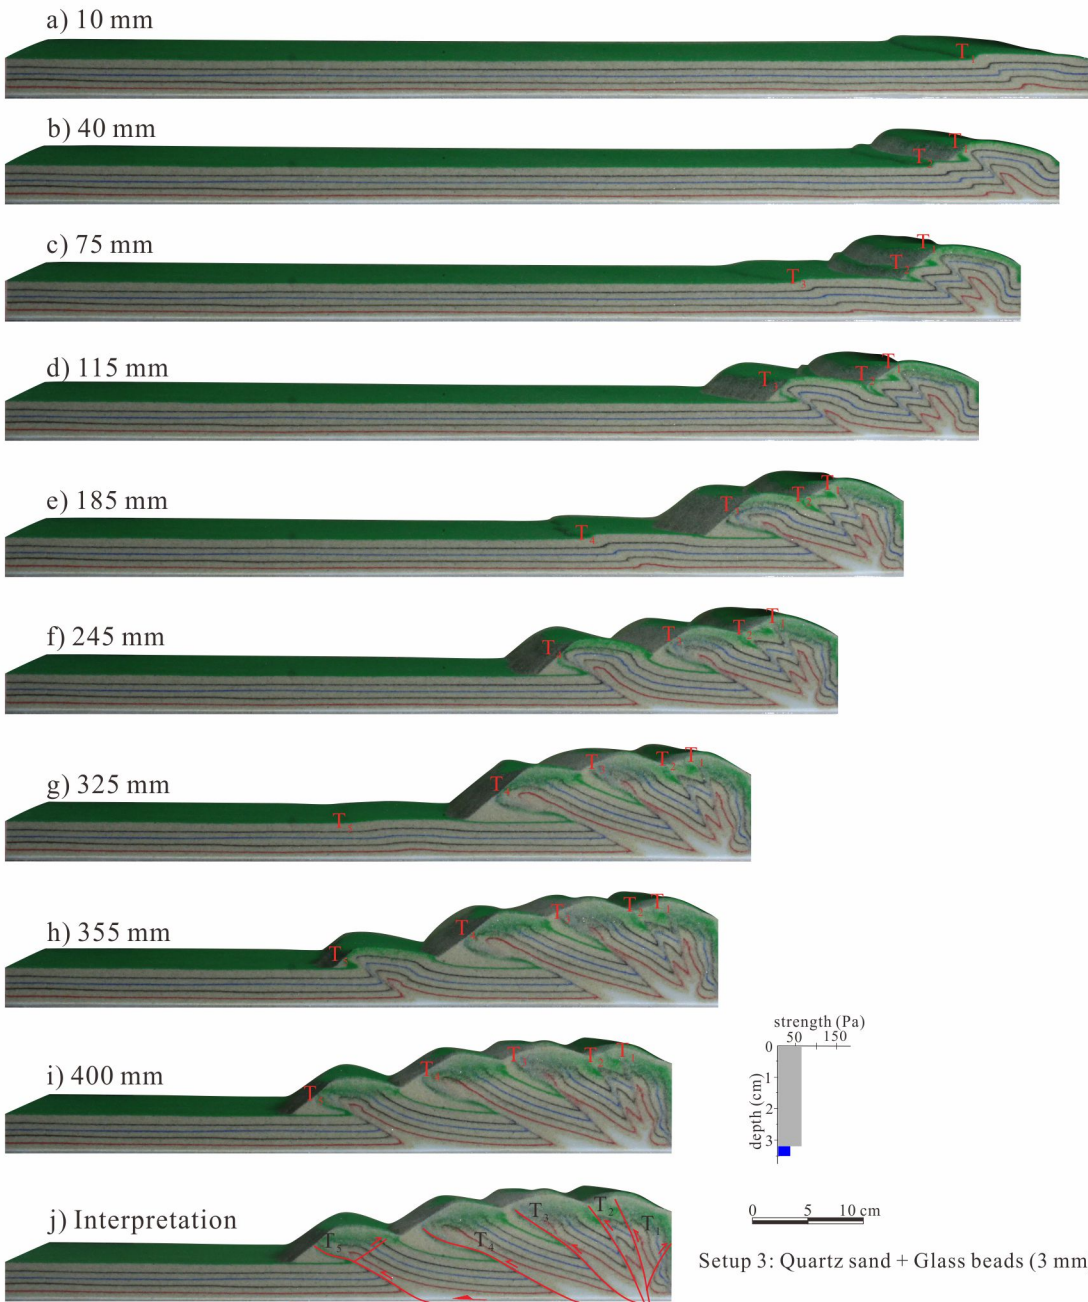

a) 20 mm

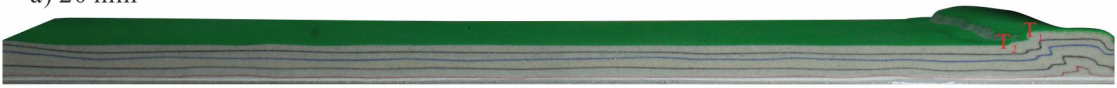

b) 60 mm

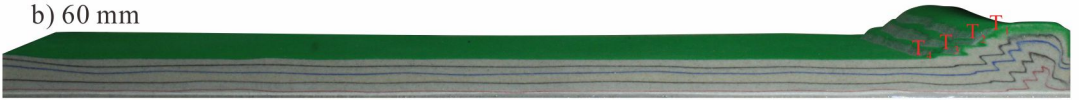

c) 75 mm

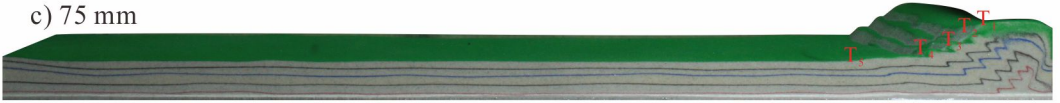

d) 105 mm

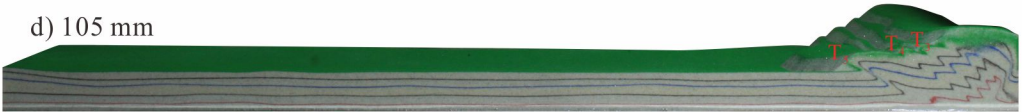

e) 165 mm

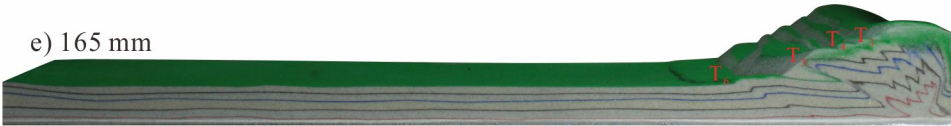

f) 190 mm

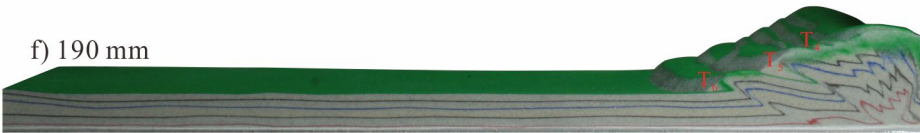

g) 235 mm

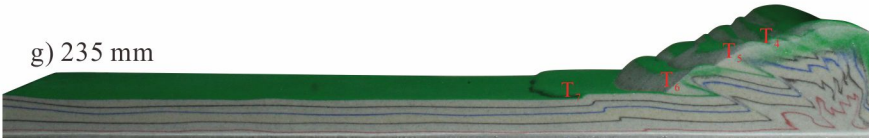

h) 300 mm

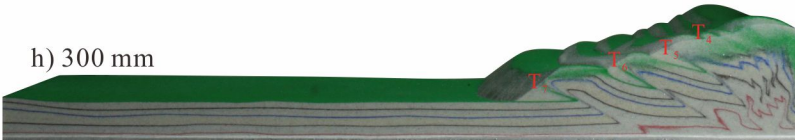

i) 370 mm

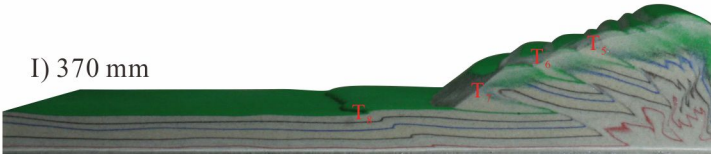

j) 400 mm

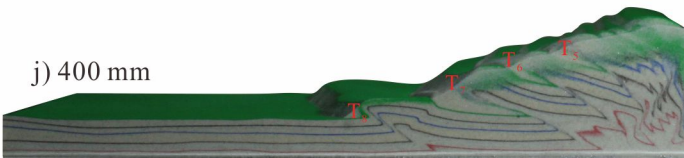

k) Interpretation

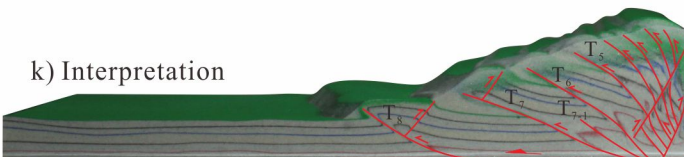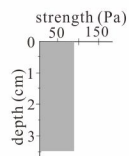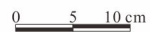

Setup 4: Quartz sand (0.2~0.3 mm)

a) 25 mm

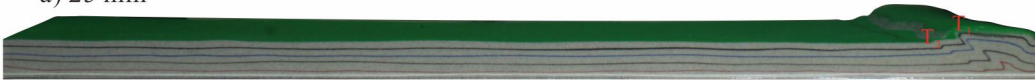

b) 85 mm

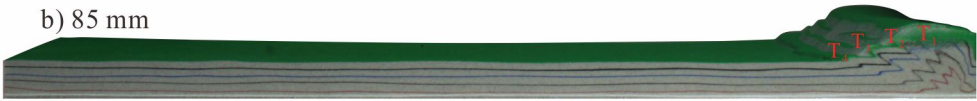

c) 145 mm

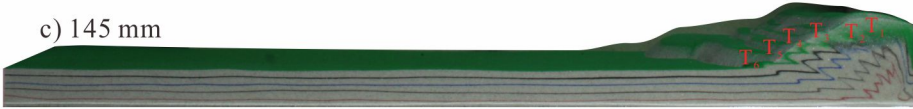

d) 170 mm

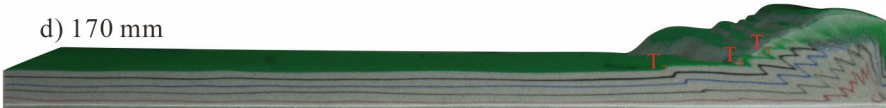

e) 230 mm

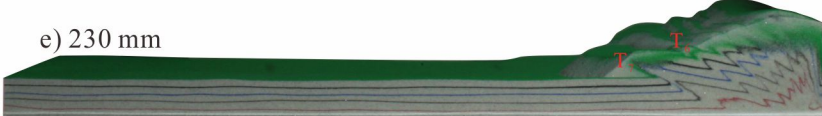

f) 250 mm

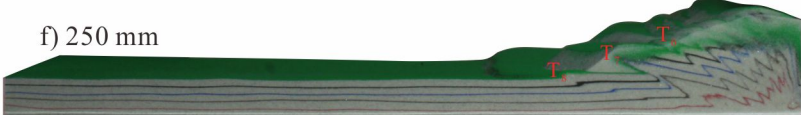

g) 320 mm

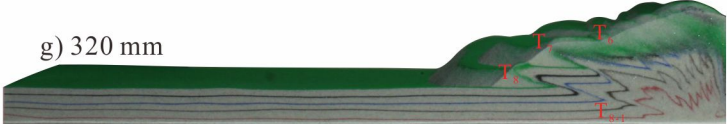

h) 350 mm

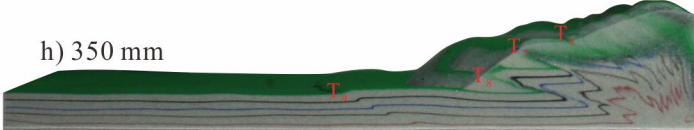

i) 400 mm

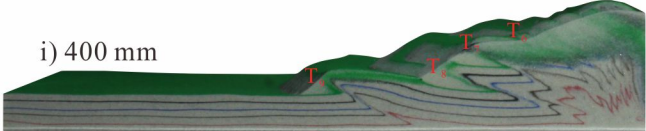

j) Interpretation

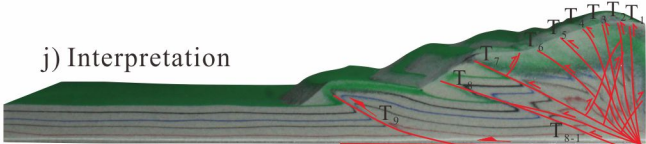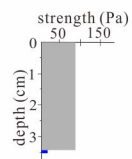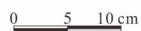

Setup 5: Quartz sand + Glass beads (1 mm)

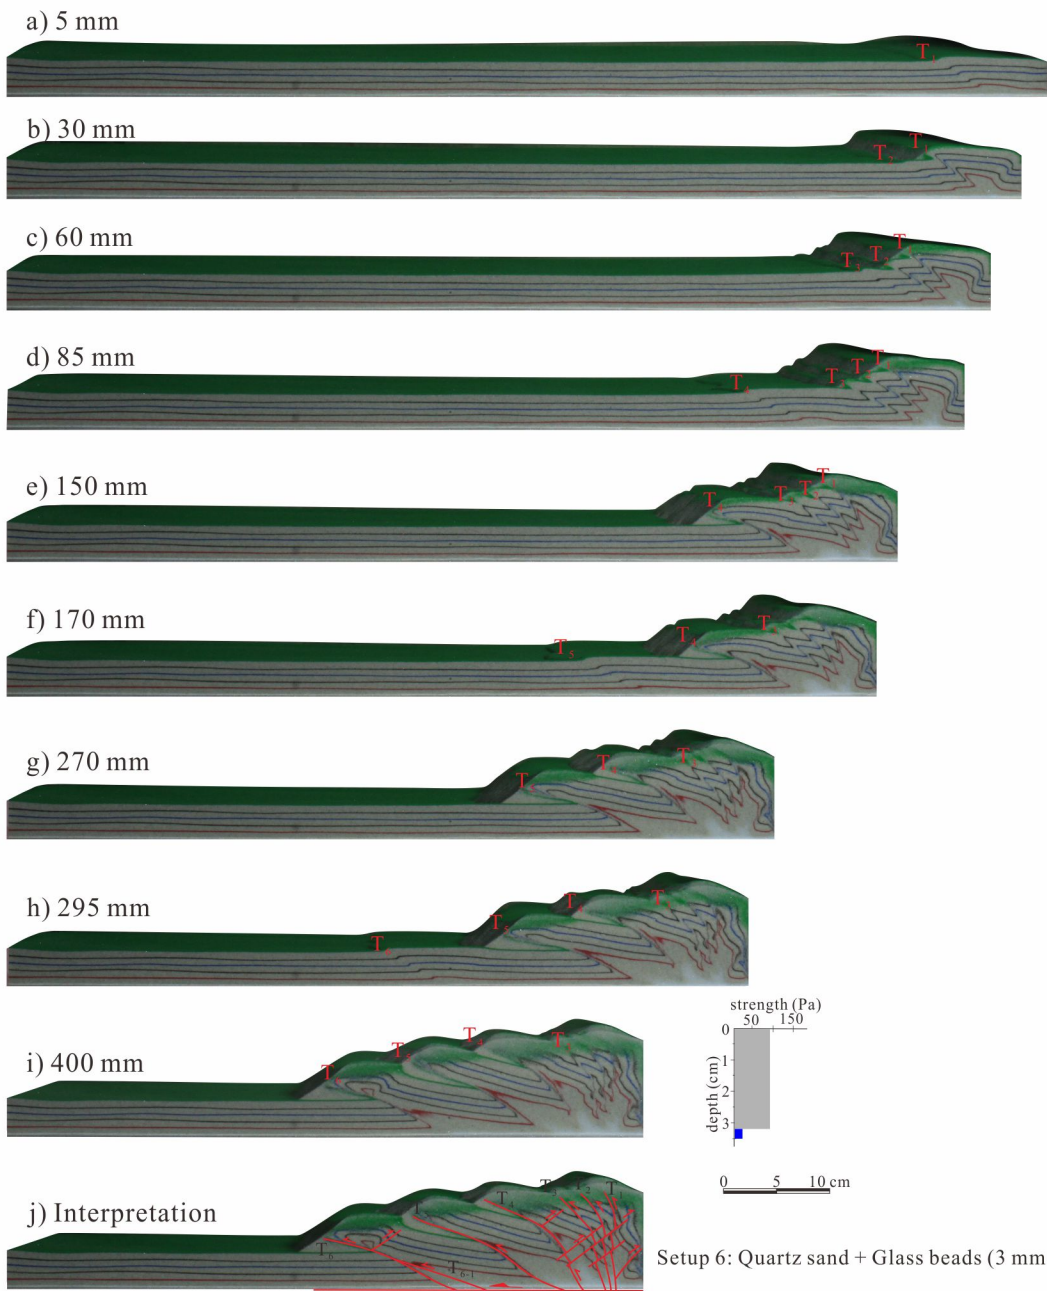

Supplement: Supplementary file [file se-2018-45-AC3-supplement.pdf]
