# Supplementary material for: To what degree the geometry and kinematics of accretionary wedges in analogue experiments is dependent on material properties
Source: Copernicus journal article supplement (doi:10.5194/se-2018-45), 2018-07-03

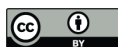

1    **To what degree the geometry and kinematics of accretionary wedges in analogue**  
2    **experiments is dependent on material properties**

3    Ziran JIANG<sup>a</sup>, Bin DENG<sup>a\*</sup>, Caiwei FAN<sup>b</sup>, Yu HE<sup>a</sup>, Dong LAI<sup>a</sup>, Shugen LIU<sup>a</sup>, Xinjian WANG<sup>a</sup>, Luba

4    JANSAC<sup>c</sup>

5    <sup>a</sup>-State Key Laboratory of Oil and Gas Reservoir Geology and Exploitation/Chengdu University of Technology,

6    Chengdu, China, 610059

7    <sup>b</sup>- CNOOC Ltd.-Zhanjiang, Zhanjiang, 524057

8    <sup>c</sup>-Earth Science Department, Dalhousie University, Halifax, N.S. Canada.

9    \*Corresponding author: [dengbin3000@163.com](mailto:dengbin3000@163.com)

10    **Abstract:** Cohesion and friction coefficients are fundamental parameters of granular materials used in  
11    analogue experiments. Thus, to test the physical characteristics and mechanical behaviour of the  
12    materials used in the experiments will help to better understand into what degree the results of  
13    experiments of geological processes depend on the material properties. Our test suggests significant  
14    differences between quartz sand and glass bead, in particular the shape factors (~1.55 of quartz sand  
15    to ~1.35 glass bead, angular to rounded) and grain sorting (moderately to well sorted). The glass  
16    beads show much better grain sorting and smaller shape factors than the quartz sand. Also they have  
17    smaller friction coefficient (~0.5 to ~0.6) and cohesion (20-30 Pa to 70-100 Pa), no matter of the grain  
18    size in our tested samples. The quartz sand shows much smaller friction coefficient (~0.6 to ~0.65),  
19    and smaller cohesion (~70 Pa to ~100 Pa) than that of smaller grain size sand. We have conducted  
20    four sets of analogue experiments with three repeats at the minimum. Our models show that material  
21    properties have important influence on the geometry and kinematics of the accretionary wedge.  
22    Although the difference in geometries are small, models with larger grain size develop wedges with

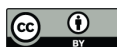

23 higher wedge height, larger taper, shorter wedge length and less number of faults under the same  
24 amount of bulk shortening. In particular, models with basal detachment (even with 1 mm thickness),  
25 show significant difference in geometry and kinematics with that of quartz sand. We thus argue that  
26 the geometry and kinematics of the wedge appear to be significantly influenced by relative brittle and  
27 ductile strengths, and, to a lesser degree by the layering anisotropy. The basal detachment (even of  
28 tiny thickness) determines the first-order control on the location and development of accretionary  
29 wedge, in a contrast to the physical properties of brittle materials.

30 **Key words:** material property, basal detachment, accretionary wedge, analogue experiment.

## 31 1 Introduction

32 Analogue experiments have been used to understand kinematic and dynamic evolution of the  
33 crust, or lithosphere structures, for more than two centuries (e.g., Hall, 1815, Cadell, 1888).  
34 Significant progress was made with improvement in monitoring equipment, e.g., X-ray techniques  
35 (Colletta *et al.*, 1991), PIV/DIC system (Adam *et al.*, 2005).

36 However, the reproducibility of analogue results and human factor are always suffered in Earth  
37 Science community since then (e.g., Paola *et al.*, 2009; Graveleau *et al.*, 2012 and references therein).  
38 Schreurs *et al.* (2006) suggest that variations in the geometry and evolution of the accretionary wedge  
39 models is result of difference in modelling materials, experimental set-ups etc. In the recent, the  
40 benchmarks experiments were performed at more than twenty laboratories, in the aim to understand the  
41 variability of analogue results and the limits of model interpretation, with each laboratory using their own  
42 analogue material and apparatus (Schreurs *et al.*, 2006), or the same material and procedures (Schreurs *et al.*  
43 *et al.*, 2016), or different algorithms (Buiter *et al.*, 2016). All models show consistence in the development of  
44 forward thrust propagation and back thrusting, but significant variations are observed in thrusts spacing,



45 their number, surface slope (Schreurs *et al.*, 2006, 2016; Santimano *et al.*, 2015; Buiter *et al.*, 2016). These  
 46 variations show that even small changes in the model setup may affect the mechanical properties of  
 47 accretionary wedge and thus cause variations in model evolution.

48 Cohesion and friction coefficients are key mechanical parameters in analogue experiments (e.g.,  
 49 Lohrmann *et al.*, 2003; Klinkmüller *et al.*, 2016). To better understand the variability and  
 50 reproducibility among analogue experiments, we choose simple experiment set-ups of brittle frictional  
 51 materials, with similar physical characteristics and mechanical behaviour, and focused on accretionary  
 52 wedge that have been performed in laboratories worldwide (e.g., Schreurs *et al.*, 2006, 2016; Santimano  
 53 *et al.*, 2015). It will help to understand to what extent the results of our experiments of geological  
 54 processes depend on the extrinsic (e.g., model setup, human factor, air humidity etc.) versus intrinsic  
 55 variability (e.g., material property, basal friction coefficient and frictional sidewall effect etc.), which  
 56 will further help us with meaningful comparisons of models results amongst other laboratories.

## 57 2 Material properties

### 58 2.1 Geometry and properties of materials

59 Two kinds of frictional materials have been used in the experiments, e.g., the quartz sand and  
 60 glass bead, which are used in the laboratories worldwide. At first, all materials are sifted using sieve  
 61 with sizes of 0.35-0.45 mm and 0.2-0.3 mm. They are divided into four sets to test their geometry  
 62 properties. The physical characteristics of four sets of materials are summarized in *Fig. 1*.

63 The bulk density of each frictional material is estimated by measuring the mass of a known  
 64 volume, that suggests that the four sets of material have bulk densities of 1.35-1.48 g/cm<sup>3</sup> (*Table 1*).  
 65 Most materials show a unimodal grain size distribution. Two sets of quartz sand, e.g., DB2017-X1 and  
 66 DB2017-X2, have a roughly homogeneous grain size distribution, with more than 60% of grains



67 falling within the 0.4-0.7 mm, and 0.25-0.4 mm fractions. Two sets of glass bead, i.e., the DB2017-B1  
68 and B2 have a less homogeneous grain size distribution, with about 50% of the grains falling within  
69 the 0.35-0.6 mm, and 0.3-0.5 mm fractions. The two sets of quartz sand show consistence between the  
70 bulk density and grain size. Samples with the larger grains have higher densities, but the glass beads  
71 are not in this situation.

72 There is no distinct difference in grain sorting between the quartz and glass beads sand. The  
73 grain sorting of all materials varies from moderately to well sorted. Furthermore, we quantified the  
74 shape of grains using SEM photographic images following the methods of Klinkmuller et al. (2016).  
75 Grain shape and outline were measured and averaged from more than 60 grains of each material. The  
76 aspect ratio of four sets of materials varies from 1.34 to 1.56, of which two sets of quartz sand are  
77 characteristics with 1.54 and 1.56, respectively, and two sets glass bead are 1.34 and 1.36, indicating  
78 better grain shape of the latter, as well as of their textures.

### 79 2.3 Mechanical behaviour of materials

80 The mechanical properties of the friction materials were determined using Schulze ring-shear  
81 tester at the GFZ in Potsdam, at low confining pressures (0.1-10 kPa) and low shear velocities, similar  
82 to those observed in analogue experiments (Lohrmann et al., 2003; Klinkmuller et al., 2016). The  
83 tester consists of a shear cell containing the frictional materials and a lid, the latter is pressed on the  
84 material at given normal load that is constant throughout an experiment. There are sensors at the lid  
85 recording the torque, which can be transformed into shear stress. Ring-shear measurements are  
86 performed at a shear velocity of 3 mm/min for 4 min at a given normal load.

87 The shear stresses of four sets of materials are shown in Fig.2, indicating of varied frictional  
88 properties. At the onset of deformation shear stress increases quickly from zero to a peak level within



89 a few millimetres of shear (strain hardening phase), and then drops to a stable value (strain softening  
90 phase) that retains for the rest of the deformation until to formation of a shear zone (sliding phase).  
91 When deformation is stopped, the sample unloaded and subsequently deformation is resumed.  
92 Renewed shearing results in a second and similar shear curve, resulting in another stress peak  
93 (reactivation phase). That is distinctly smaller than the first peak level, and roughly larger than the  
94 value of the first stable phase (*Fig.2*). It should be noted that the slightly increased values are artifact  
95 of the setup, result of the fact that the lid of shear cell slowly burrows into the tested materials during  
96 shearing, thereby increasing the friction at its side walls (*Lohrmann et al., 2003*). Furthermore, three  
97 values of friction strengths, e.g., peak strength, dynamic strength and reactivation strength, are picked  
98 manually from these curves, for the applied normal load. For each material, the three values of friction  
99 strengths, e.g., peak strength, dynamic strength and reactivation strength, are determined for six  
100 different normal loads varying between 500 Pa and 16000 Pa. Each normal load step is repeated three  
101 times, resulting in a total of 18 measurements for each material.

102 Measured values of peak strength, dynamic strength and reactivation strength are plotted against  
103 the applied normal stresses, respectively (*Fig.3*). All four sets of materials show an approximately  
104 linear increase of all three values with normal stresses, consistent with a Mohr-Coulomb failure  
105 criterion. Thus, a linear regression analysis is applied to the three values of all materials, to obtain  
106 their friction coefficient ( $\mu$ ), which corresponds to the slope of the line and the friction angle ( $\tan^{-1} \mu$ ).  
107 Furthermore, the cohesion ( $C$ ) is the linearly extrapolated value at zero normal stress (*Table 1*). It  
108 should be noted that the failure envelopes for frictional materials is usually non-linear at low normal  
109 stresses. We use further an alternative method to derive friction coefficients and related cohesion of  
110 four sets of materials. This method calculates two point slopes and their intercepts for mutually

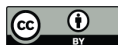

111 combined pairs of a data set (e.g., *Klinkmuller et al., 2016*). A total of 18 measurements for each  
112 material thus resulted into 135 data sets for friction coefficient and cohesion. Those are then evaluated  
113 by means of calculating mean and standard deviation and comparing the probability density function  
114 to a normal distribution (*Fig.3*).

115 For the data sets obtained by two methods of the linear regression and mutual pairs regression  
116 analysis, we have found a slight difference between them. (1) peaks of the experimental probability  
117 density function are close to or narrower than a normal distribution. (2) cohesion values from the  
118 mutual pairs regression analysis are usually smaller than the values from the linear regression analysis.  
119 We thus prefer the calculated standard deviation as a conservative value for the four sets of frictional  
120 materials (*Table 1*).

121 For all the four sets of material, there is a systematic decrease in the values of friction coefficient  
122 from internal peak friction to internal reactivation friction, to internal dynamic friction (*Fig.3*). At the  
123 same way, the angles of them systematically decrease with 2-5 °by turn (*Table 1*). Internal peak  
124 friction angles are 38 °for two sets of quartz sand, with friction coefficients of 0.783 and 0.798 (e.g.,  
125 DB2017-X1 and X2), respectively. Glass beads have much lower angles of internal peak friction of  
126 31 °, and friction coefficients of 0.594 and 0.612 (e.g., DB2017-B1 and B2).

127 Internal reactivation friction and dynamic friction angles for sample DB2017-X1 are 34 °and 31 °,  
128 with friction coefficients of 0.687 and 0.599, respectively. For sample DB2017-X2 with much smaller  
129 grain size than the former one, those angles are 33 °and 30 °with related friction coefficients of 0.656  
130 and 0.582, indicating much smaller values than those of DB2017-X1. Two sets of glass beads have  
131 lower angles of internal reactivation friction and dynamic friction with 28 °and 25 °, 30 °and 26 °,  
132 respectively. Whilst the friction coefficients are 0.530 and 0.495, 0.569 and 0.493 for samples of



133 DB2017-B1 and B2. For the two sets of glass beads, the internal friction angles distinctly increase  
134 with the decreased mean grain size, but not in the quartz sands. It should be noted that the internal  
135 friction angles of glass beads are substantially smaller than that of quartz sands, no matter of their  
136 mean grain size.

137 The extrapolated cohesion values of internal peak friction, reactivation friction and dynamic  
138 friction vary considerably, in particular the internal peak friction. Sample DB2017-X1 is characterized  
139 by roughly similar cohesion values of reactivation friction and dynamic friction, e.g., 68 Pa,  
140 significantly larger than that of internal peak friction with -9 Pa. For sample DB2017-X2, the  
141 cohesion values of internal reactivation friction and dynamic friction are 125 Pa and 92 Pa, in contrast  
142 to peak 2 Pa of cohesion values at internal peak friction. Extrapolated cohesion values of glass beads  
143 are distinctly smaller than that of poor quartz sand (*Fig.3*). The cohesion values of internal  
144 reactivation friction and dynamic friction are 28 Pa and 16 Pa, 71 Pa and 37 Pa (e.g., DB2017-B1 and  
145 DB2017-B2), respectively. In the four sets of materials, the cohesion value of reactivation friction is  
146 highest, whilst the peak friction is the lowest.

147 *Klinkmuller et al. (2016)* used the same ring-shear tester to determine the material properties of  
148 frictional materials widely used in more than twenty laboratories worldwide. The obtained values  
149 correspond closely to ours, with internal friction angles of 32-40 ° at peak friction, and mean values of  
150 30-37 °, 28-34 ° at reactivation friction and at dynamic friction, respectively. Most of their values of  
151 friction coefficient at dynamic friction and reactivation friction are roughly equal, and substantially  
152 smaller than that at peak friction.

### 153 3 Experiment setup and results

#### 154 3.1 Experiment setup

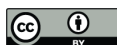

155 In all experimental set-ups, a quartz sand wedge with horizontal base and surface slope was  
156 sieved in with 48 cm height into the deformation apparatus with an initial sand pack of 800×340×350  
157 mm. Of which color quartz sand with thickness of ~1 mm was used as a layer marker in the  
158 experiments. To reduce the amount of friction, a lubrication of glass wall was done before  
159 sieving-load quartz sand. Thus, there is no significant bias of frictional sidewall effect in our  
160 experiments, as the ratio of the area contacts of the sand body with glass sidewalls to its area of  
161 contact with basement remains 0.05-0.1 (Bouloumiac *et al.*, 2012). Sand models were deformed in  
162 pure shear, moving a vertical rigid wall from right side with a constant velocity of 0.001 mm/s (e.g.,  
163 Deng *et al.*, 2017). After 400 mm shortening, a comparison of all results was carried out.  
164 Although slight difference may be in the material properties, variations in material properties are  
165 important for differences in the geometry and structural evolution of experimental models (Schreurs *et al.*,  
166 2006, 2016), e.g., and kinematics of thrust wedges as a function of their material properties  
167 (Lohrmann *et al.*, 2003). To understand how important material properties in our analogue  
168 experiments are, we conducted six experiments with two sets of quartz sand (e.g., No.1 and No.4),  
169 and two sets with glass bead with 1 mm thickness (e.g., No.2 and No.4) and 3 mm thickness (e.g.,  
170 No.3 and No.6) (Table 2, Fig.4).

171 The deformation of wedge was photographically recorded using time-lapse photography at every  
172 1.0 mm of contraction. Using a graphic software package, a set of parameters was systematically  
173 measured at 10 mm intervals to describe quantitative results of the wedge. Cross-sections allow us to  
174 measure the wedge geometries and fault spacing, following the method used by Buiter *et al.* (2016)  
175 and Schreurs *et al.* (2016) in their experiments. In particular, the wedge slope angle was measured as  
176 the best fitting line through the intersection of the fault tips and the surface of accretionary wedge





177 (e.g., Brockmal et al., 2007).

### 178 3.2 Experiment results of quartz sands

179 At first, we tested each set of quartz sands in a classic analogue experiment, with similar set-up

180 to analyze the deformation style and mechanical behavior. All results confirm that deformation of

181 quartz sand generate accretionary wedges with thrust planes dipping toward the moving wall and

182 propagating sequentially forward (Fig.4). However, deformation styles are slightly different between

183 materials after 400 mm shortening. Setup No.1 and No.4 present few well-individualized thrusts and

184 back thrusts and low slope angle ( $18.7^\circ$  for No.1 to  $5^\circ$  for No.4). Besides, the setup No.1 has

185 higher wedge height (135.3 mm to 4.0 mm) and shorter wedge length (292.6 mm to 22.2 mm)

186 than the No.4. This is certainly due to its lower cohesion and smaller friction coefficient than the

187 quartz sand of DB2017-X2, used in the setup No.4.

188 During progressive shortening, accretionary wedges show common characteristics such as: (1) a

189 rapid growth and subsequent slow self-similar growth (Fig.5, Fig.6), consistent with the critical taper

190 theory (e.g., Storti et al., 2000; McClay & Whitehouse, 2004; Deng et al., 2017), and (2) quartz sand

191 slides stably and is translated/moved along the horizontal base and is affected by internal deformation

192 during the self-similar growth processes. All model wedges grows rapidly in height and length with

193 progressive shortening during the early stage, until a critical wedge state were attained at  $\sim 100$  mm

194 shortening (Fig.6), at which three (e.g., setup No.1) and four (e.g., No.4) developed in-sequence

195 imbricate thrusts nucleated and formed an internal backstop. Subsequently, the wedges growth are

196 self-similar, or quasi-stable. There are sharp jumps in the wedge slope angle and length, that reflect

197 the nucleation of each new foreland-verging thrust. The subsequent decrease in wedge length prior to

198 the development of the next new thrust indicates internal shortening and deformation within the



199 wedge. It should be further noted that there is a slight decrease in the wedge slope angle during the  
200 progressive shortening, followed by a distinct increase in the angle (*Fig.5*). It implies that for the  
201 wedge to overcome the basal and internal friction, it undergoes internal deformation with  
202 layer-parallel shortening until it again reaches a critical wedge slope that brings accretionary wedge  
203 slide and translation foreland.  
204 In the two models with quartz sand, there are distinct changes in the wedge slope angle (e.g.,  
205 3-5 ° for No.1 and 4-6 ° for No.4), and wedge length (e.g., 10-30 mm for No.1 and 10-20 mm for No.4)  
206 during the self-similar growth progress. However, the difference in wedge slope angle between No.1  
207 and No.4 is roughly 2-4 °, and ~10 mm for wedge length with a certain given shortening (*Fig.5, Fig.6*),  
208 indicating similarity in the wedge geometries.

### 209 3.3 Experimental results of quartz sand with basal detachment

210 In our model comparison, we choose to use quartz sand and glass bead used at the laboratory,  
211 e.g., setup No.2 and No.3, setup No.5 and No.6. In these four models, all accretionary wedges show a  
212 rapid growth and subsequent slow self-similar growth. After 400 mm shortening, setup No.2 and No.3  
213 present fewer well-individualized foreland thrusts (5 and 6) and lower slope angle (10.3 ° and 9.8 °)  
214 than the setup No.1, as well as shorter wedge height (e.g., 101.9 mm for No.2, 102.0 mm for No.3)  
215 and longer wedge length (e.g., 375.1 mm, 349.3 mm) (*Fig.4*). Furthermore, setup No.5 and No.6 show  
216 fewer well-individualized foreland thrusts (9 and 6) and lower slope angle (16.5 ° and 12.2 °), as well  
217 as shorter wedge height (e.g., 122.2 mm, 106.8 mm) and longer wedge length (e.g., 328.6 mm 327.3  
218 mm) than the setup No.3. In particular, more backthrusts developed in these experiments setup No.1  
219 and No.4, consequently accretionary wedges are characterized by small pop-up structures. We argue  
220 that such variability is due to basal detachment with glass beads in these four experiments. It should



be noted that the wedge slope angle and wedge height decreased with increasing thickness of basal detachment with glass beads, as well as wedge length increased, e.g., from setup No.1 to No.3, and No.4 to No.6, respectively.

During progressive shortening, there are sharp jumps in the wedge slope angle and length, followed by slow decrease of their values in the last, self-similar growth progress (*Fig.5, Fig.6*). It is

consistent with internal deformation of layer-parallel shortening (e.g., *Koyi and Vendeville, 2003; Deng et al., 2017*). For setup No.2 and No.3, there are distinct changes in the wedge slope angle (e.g.,

2-4 ° and 4-6 °), and wedge length (e.g., 20-40 mm and 10-30 mm) during the self-similar growth progress, than at the setup No.1. However, the variations of wedge angle and length are 3-5 ° and

2-4 °, 10-20 mm and 10-30 mm for No.5 and No.6, respectively. Although no distinct difference of wedge slope angle is between No.1 and No.4 setup, significant variations occurred between No.2 and

No.5 (e.g., 4-10 °), and between No.3 and No.6 (e.g., 2-8 °) setups (*Fig.5*). Similarly, significant variations in wedge length can be found between No.2 and No.5 (e.g., 20-50 mm) setups, which are

much larger than those between No.3 and No.6 (e.g., 10-30 mm) setups (*Fig.6*). Thus, we suggest that

the mechanical properties consisted of lower internal friction and cohesion, e.g., glass beads at basal detachment, will substantially affect the wedge geometry.

## 4 Discussion

### 4.1 Wedge geometry with various materials

That a decrease in wedge strength controlled by internal friction and cohesion of materials, as the

decreases of the slope angle and height, and increases of the wedge length have been proven by

several experiments (e.g., *Koyi and Vendeville, 2003; Nilforoushan et al., 2008*). The topography lines

for each 2 cm shortening have been depicted in all models (*Fig.7*), which shows an increase of the



243 wedge height during progressive shortening. However, the height of wedges including no  
244 low-frictional basal detachment (e.g., setup No.1 and No.4) constantly increases and hinterland thrusts  
245 are active during all stages of shortening. In wedges including basal detachments (e.g., glass beads),  
246 the forward thrusts are inactive and backthrusts are active in the hinterland zone (Fig.5). The height of  
247 wedges remains constant after the deformation is transferred into the foreland zone. Analysis of the  
248 wedge geometry of models (e.g., Nos. 2, 3, 5 and 6), shows that the height of the wedges remains in a  
249 steady state after a certain shortening, e.g., 340 mm shortening for No.2 and No.5, 300 mm shortening  
250 for No. 3 and No. 6, respectively. It suggests that the accretionary wedge slides and is translated along  
251 the basal detachment in a steady state.

252 We have found, when investigating these models, that the internal friction and cohesion variation  
253 changes the wedge slope angles. However, the difference in geometry of models, using only frictional  
254 materials (e.g., quartz sand X1 and X2), is not distinct. In another way, all wedges used only frictional  
255 materials show a very similarity in the wedge geometry. As we have illustrated previously, the  
256 difference in geometry, e.g. slope angle, number of forward and back thrusts is more pronounced  
257 when models contain basal detachment of glass beads. This implies that the basal detachment  
258 determine the first-order control on localization and development of accretionary wedge, as opposed  
259 to the properties of brittle materials (e.g., Teixell and Koyi, 2003; Ellis et al., 2004). We thus infer that  
260 with more complex brittle-viscous rheology, there are more complicated variations in the accretionary  
261 wedge.

## 262 4.2 Wedge kinematics with various materials

263 The evolution of all models is roughly similar, with development of accretionary wedge by  
264 in-sequence forward thrusting and by minor back thrusting. In general, thrusts are nucleated soon after

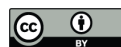

265 the beginning of shortening at the base of the models. They are propagating upward across the  
 266 accretionary wedge and then reach the top surface as a brittle structure. However, significant  
 267 variations existed between models in kinematics (*Fig.8*), in particular in the number of thrusts, fault  
 268 space and fault displacement (*Ellis et al., 2004; Schreurs et al., 2006; Santimano et al., 2015*).  
 269 During the early stage of deformation, closely forward thrusts developed with regular spacing across  
 270 the models. Thus, the fault spacing and displacement are substantially smaller in the early stage than  
 271 in the later stage. Subsequently, the kinematic evolution of these models distinctively changes, the  
 272 number of thrusts decrease and spacing between successive imbricate thrusts increase significantly.  
 273 The imbricate forward thrusts are characterized by comparative fault spacing and displacement. The  
 274 important point in these models is that during the progressive shortening, the sequence of thrusts  
 275 formation is quite rapid in models with basal detachment, and consequently accommodated with  
 276 fewer forward thrusts. The thicker is the basal detachment, the fewer fault number is in the wedge and  
 277 vice versa.

278 Forward thrusts are more frequent and closely spaced with smaller displacement in the earlier  
 279 stages of deformation, and widely spaced with larger displacement during later stage of deformation.  
 280 However, thrusts, which developed above the basal detachment, are lesser in number and relatively  
 281 widely spaced and displaced in all models. In particular, a roughly linear increase of fault spacing can  
 282 be found in models with basal detachment, e.g.,  $D_{(T_3/T_2)}$  to  $D_{(T_5/T_4)}$  in setup No.3,  $D_{(T_4/T_3)}$  to  $D_{(T_6/T_5)}$   
 283 in setup No.5 and No.6 (*Fig.9*), no matter of the thickness of the detachment during the later stage.

284 It should be noted that glass bead in these models, even with a limited thickness (e.g., ~ 1 mm in  
 285 setup No.2 and No.5), acts as basal detachment and triggers minor thrusts with locally modified thrust  
 286 trajectories. This is evidenced by (1) development of second order thrusts, e.g.,  $T_{5-1}$  and  $T_{5-2}$  in setup



287 No.2 (Fig.5); (2) widespread development of backthrusts, e.g., in setup No.2 and No.5; (3)  
 288 development of small ramp and flat geometry, e.g., thrust  $T_4$  and  $T_5$  in setup No.2 ; (4) variable  
 289 displacement and slip along the thrusts, e.g., amount of displacement for each thrusts and slip  
 290 measured at the surface being large and decreasing with increasing depth (Ahamed *et al.*, 2014;  
 291 Schreurs *et al.*, 2016).

### 292 4.3 Extrinsic versus intrinsic variability of models

293 Both extrinsic and intrinsic variability of analogue experiments have influence on the geometry  
 294 and kinematics of accretionary wedges. Therefore, we used statistical analysis to study extrinsic and  
 295 intrinsic variability (e.g., material properties) at the stage of self-similar growth of wedges, following  
 296 the methods of Santimano *et al.* (2015). Except the wedge length with values larger 0.2, the statistical  
 297 results of coefficient of variation (CV) show that most of parameters range from 0.05 to 0.2, with an  
 298 average of ~0.1 (Fig.9). Accordingly the CV is lower for thrust-ramp displacement (CV=0.01-0.1),  
 299 thrust-ramp angle (CV=0.07-0.18), wedge height (CV=0.06-0.14) and wedge slope (CV=0.05-0.2),  
 300 and higher for wedge length (CV=0.2-0.31). The main difference between those parameters is that  
 301 wedge length is time dependent and may reflect evolving wedge dynamics, however, the other  
 302 parameters are not time dependent, related to properties of the entire wedge.

303 Furthermore, the statistical test ANOVA shows that parameters can be divided into two categories,  
 304 based on their P values and  $R^2$  values. For the first category, most of the p values for wedge slope are  
 305 much smaller than 0.05, and with larger  $R^2$  values  $> 0.1$ . The second category is with higher p values  
 306 of 0.4-1.0 (most are with values of 0.6-1.0), and lower  $R^2$  values  $< 0.1$  (most are with values  $< 0.02$ ).  
 307 Accordingly the p value for thrust-ramp angle and displacement are 0.36-0.94, 0.39-0.98, for wedge  
 308 length and height are 0.62-0.89, 0.28-0.98, respectively.



309 As we known, a large  $R^2$  and smaller **p** values suggest that the variation in our models is due to  
310 the experimental setup, or extrinsic sources, rather than due to the variation with the system (Zar,  
311 2010; Santimano *et al.*, 2015). In particular, a **p** value >5% suggests repeatability of the data from  
312 different experiments of the same setup, or reproducibility of the model. Therefore, the statistical test  
313 ANOVA recognizes that the variation in the observables (e.g., geometry and kinematic parameters) is  
314 repeatable between our analogue experiments, except for the wedge slope. It further indicates  
315 increased effect on the wedge slope angle from the extrinsic variability, e.g., human-factor, or more  
316 susceptible to extrinsic changes in the accretionary wedge (Buiter *et al.*, 2006; Santimano *et al.*,  
317 2015).

#### 318 4.5 Comparison of the Natural Examples

319 In addition to the investigation of the effect on mechanical properties of accretionary wedge, we  
320 can consider the role of weak basal detachments on the geometry and deformation in natural examples,  
321 like the Zagros fold-thrust-belt Longmenshan fold-thrust-belt. In our models, we observe that the  
322 different thickness of quartz sand above weak basal detachment deforms differently. The upper  
323 frictional material decouples the deformation, and the geometry and kinematics of structures above  
324 the basal detachment are different. A similar deformation mechanism was reported by Sherkati *et al.*  
325 (2006), who used surface and seismic data and borehole information to construct interpreted  
326 cross-section of the Zagros. They suggested that the deformation across and along the Zagros belt  
327 varies due to the spatial distribution of shale and evaporitic layers. Such geometrical and kinematic  
328 changes are further supported by analogue experiments that related to different parts of the Zagros  
329 belt (Sherkati *et al.*, 2005; Deng *et al.*, 2017).

330 Another natural example is from the Longmenshan fold-thrust-belt at eastern margin of Tibetan



331 plateau, where there is significant change in the thickness of Lower Cambrian Qiongzhusi Formation,  
332 dominated by black shale. The thickness of Qiongzhusi Formation is at maximum of ~1500 m, in a  
333 contrast to ~0 m in the southern segment of the western foreland basin, as result of the erosion (*Liu et*  
334 *al.*, 2017). During the Late Triassic, the Songpan-Ganzi flysch strata were thrust southeastward onto  
335 the Sichuan Basin, along the Longmenshan fold-thrust-belt, to form the western Sichuan foreland  
336 basin (*Li et al.*, 2003; *Liu et al.*, 2012), as an accretionary wedge. The structural configuration across  
337 the Longmenshan fold-thrust-belt is shown in cross-section that has been constructed using seismic  
338 reflection profiles and borehole data (e.g., *Jia et al.*, 2006; *Lu et al.*, 2012). In the northern segment of  
339 the Longmenshan the Paleozoic strata, such as at Tianjingshan and Anxian areas, was southeastward  
340 thrust onto the gentle deformed Mesozoic strata in the foreland basin (*Jing et al.*, 2009; *Lu et al.*,  
341 2012). In particular, there was substantial increase in the thickness of the anticline core comprised by  
342 Mesozoic strata, due to shortening deformation of the Lower Cambrian strata. The deformation of  
343 Mesozoic strata on anticlinal limbs reveals contemporaneity of tectonic activity. In the profile, the  
344 deep-seated strata are associated with pop-up structures, as shown e.g., in the Well Tianjian-1, and  
345 almost all the thrusts are associated with minor backthrusts. Such a structural style shows close  
346 similarity with one observed in our models (*Fig. 5*). To the southern segment of the Longmenshan, the  
347 main structural features are dominated with prominent thrusts that rooted in the base, probably in  
348 Sinian units (*Jia et al.*, 2006; *Hubbard et al.*, 2010). Similar feature was observed in the analogue  
349 experiments with high-friction basal detachment. Such correlation between deformation with basal  
350 detachment is further associated with different topography and slope across the Longmenshan  
351 fold-thrust-belt, e.g., much higher topography and slope in the southern segment of Longmenshan  
352 than that of northern segment (*Kirby and Ouimet*, 2011; *Li et al.*, 2012).





353 In addition to influencing the geometry and kinematics of model wedges, the basal detachment  
354 also governs both the volumetric-strain and layer-parallel shortening of the wedge (*Teixell and Koyi,*  
355 *2003; Nilfouroushan et al., 2012*). Applied to the nature, our model results suggest that more forward  
356 and back thrusts and deformation with higher volumetric-strain are expected in convergent settings,  
357 with a high-friction basal detachment, than in those shortened above low-friction basal detachment, or  
358 a weak base. Such deformation has major implications for prospecting hydrocarbon systems within  
359 fold-and-thrust belts.

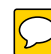

## 360 5 Conclusion

361 In analogue experiments as well as in the nature, material properties and mechanical stratigraphy  
362 are important elements in geometry and kinematics of accretionary wedge. Its evolution shows a rapid  
363 growth and subsequent slow self-similar growth, that wedge slides and is translated along the  
364 horizontal base in a steady state. However, the material properties affect the wedge geometry and  
365 kinematics in various ways. Two setups of models with quartz sand show no distinct difference in  
366 wedge geometry, however, model with larger grain size developed wedge with distinct variations in  
367 wedge kinematics. In particular, models with 1 mm thick glass beads bed show significant differences  
368 from experiments with quartz sand, e.g., lower wedge height and smaller taper, shorter wedge length  
369 and less number of faults. The changes in the geometry and kinematics of accretionary wedge are  
370 most pronounced when the thickness of basal detachment is larger.

371 Applied to the nature, our model results suggest that more forward and back thrusts companied  
372 with lower wedge slope angle and height and larger wedge length, are expected in convergent settings  
373 with a high-friction basal detachment, than in those shortened above a low-friction basal detachment,  
374 e.g., the salt formation under parts of the Zagros fold-thrust belt, and shale formation under parts of



375 the northern segment of the Longmenshan fold-thrust belt.

## 376 **Acknowledgements**

377 This work was supported by the Natural Science Foundation of China (Nos. 41572111) and Natural  
378 Science Foundation of Sichuan Province (No. 2017JQ0025), and by EPOS TAN and its member GFZ  
379 Helmholtz Centre POTSDAM, and we appreciate Dr. Matthias Rosenau for his help in the ring-shear  
380 testing and manuscript.

## 381 **References**

- 382 Adam, J., Urai, J.L., Wieneke, B., Oncken, O., Pfeiffer, K., Kukowski, N., Lohrmann, J., Hoth, S., van der  
383 Zee, W., Schmatz, J.: Shear localization and strain distribution during tectonic faulting—new insights  
384 from granular-flow experiments and high-resolution optical image correlation techniques: *Journal of*  
385 *Structural Geology*, 27, 283-301, 2005.
- 386 Ahmad, M.I., Dubey, A.K., Toscani, G., Bonini, L., Seno, S.: Kinematic evolution of thrusts wedge and  
387 erratic line length balancing: insights from deformed sandbox models: *Int. J. Earth Sci. (Geol. Rundsch)*,  
388 103: 329-347, 2014.
- 389 Buiter, S. H., Babeyko, A., Ellis, S., Gerya, T. V., Kaus, B. P., Kellner, A., Schreurs, G., Yamada, Y.: The  
390 numerical sandbox: comparison of model results for a shortening and an extension experiment. In:  
391 Buiter S H, Schreurs G (Eds.), *Analogue and Numerical Modelling of Crustal-Scale Processes*: *Geol.*  
392 *Soc. London Spec. Publ.*, 253, pp. 29-64, 2006.
- 393 Buiter, S., Schreurs, G., Albertz, M., Gerya, T., Kaus, B., Landry, W., Pourhiet, L., Mishin, Y., Egholm, D.,  
394 Cooke, M., Maillot, B., Thieulot, C., Crook, T., May, D., Souloumiac, P., Beaumont, C.: Benchmarking  
395 numerical models of brittle thrust wedges: *Journal of Structural Geology*, 92: 140-177, 2016.
- 396 Cadell, H.M.: Experimental researches in mountain building: *Transactions of the Royal Society of*



- 397       Edinburgh, 35: 337-357, 1888.
- 398       Colletta, B., Letouzey, J., Pinedo, R., Ballard, J. F., Bale, P.: Computerized X-ray tomography analysis of
- 399       sandbox models: *Geology*, 19: 1063-1067, 1991.
- 400       Deng, B., Jiang, L., Zhao, G.P., Huang, R., Wang, Y.B., Liu, S.G.: Insights into the velocity-dependent
- 401       geometry and internal strain in accretionary wedges from analogue models: *Geological Magazine*, doi:
- 402       10.1017/S0016756816001266, 2017.
- 403       Ellis, S., Schreurs, G., Panien, M.: Comparisons between analogue and numerical models of thrust wedge
- 404       development: *Journal of Structural Geology*, 26: 1659-1675, 2004.
- 405       Graveleau, F., Malavieille, J., Dominguez, S.: Experimental modelling of orogenic wedges: A review:
- 406       *Tectonophysics*, 538-540: 1-66, 2012.
- 407       Hall, J.: On the vertical position and convolutions of certain strata and their relation with granite:
- 408       *Transactions of the Royal Society of Edinburgh*, 7: 79-108, 1815.
- 409       Hubbard, J., Shaw, J.H., Klinger, Y.: Structural Setting of the 2008 Mw 7.9 Wenchuan, China, Earthquake:
- 410       *Bulletin of the Seismological Society of America*, 100: 2713-2735, 2010.
- 411       Jia, D., Wei, G.Q., Chen, Z.X., Li, B.L., Zeng, Q., Yang, G.: Longmenshan fold-thrust belt and its relation
- 412       to western Sichuan Basin in central China: New insights from hydrocarbon exploration: *AAPG Bulletin*,
- 413       90, 1425-1447, 2006.
- 414       Jin, W.Z., Tang, L.J., Yang, K., Wang, G.M., Lü Z.Z., Yu, Y.X.: Transfer zones within the Longmenshan
- 415       thrust belt, SW China: *Geosciences Journal*, 13(1): 1-14, 2009.
- 416       Kirby, E., Ouimet, W.: Tectonic geomorphology along the eastern margin of Tibet: insights into the pattern
- 417       and processes of active deformation adjacent to the Sichuan Basin: *Geological Society, London, Special*
- 418       *Publications*, 353: 165-188, 2011.



- 419 Klinkmuller, M., Schreurs, G., Rosenau, M., Kemnitz, H.: Properties of granular analogue model materials:  
420 A community wide survey: Tectonophysics, 684: 23–38, 2016.
- 421 Koyi, H. A., Vendeville, B. C., 2003. The effect of décollement dip on geometry and kinematics of model  
422 accretionary wedges. Journal of Structural Geology, 25 (9), 1445-1450.
- 423 Li, Y., Allen, P.A., Densmore, A.L., Xu, Q.: Evolution of the Longmenshan foreland basin (western  
424 Sichuan Basin) during the Late Triassic Indosinian orogen: Basin Research, 15: 117-138, 2003.
- 425 Li, Z.W., Liu, S.G., Chen, H.D., Deng, B., Hou, M.C., Wu, W.H., Cao, J.X.: Spatial variation in  
426 Meso-Cenozoic exhumation history of the Longmen Shan thrust belt (eastern Tibetan Plateau) and the  
427 adjacent western Sichuan basin: Constraints from fission track thermochronology: Journal of Asian  
428 Earth Sciences, 47: 185-203, 2012.
- 429 Liu, S.G., Deng, B., Li Z.W., Sun, W.: Architectures of Basin-Mountain Systems and Their Influences on  
430 Gas Distribution: A Case Study from Sichuan basin, South China: Journal of Asian Earth Sciences, 47:  
431 204-215, 2012.
- 432 Liu, S.G., Deng, B., Jansa, L., Zhong, Y., Sun, W., Song, J.M., Wang, G.Z., Wu, J., Li, Z.W., Tian, Y.H.:  
433 The Early Cambrian Mianyang-Changning Intracratonic Sag and Its Control on Petroleum  
434 Accumulation in the Sichuan Basin, China: Geofluids, doi: 10.1155/2017/6740892, 2017.
- 435 Lohrmann, J., Kukowski, N., Adam, J., Oncken, O.: The impact of analogue material properties on the  
436 geometry, kinematics, and dynamics of convergent sand wedges: Journal of Structural Geology, 25 (10),  
437 1691-1711, 2003.
- 438 Lu, R.Q., He, D.F., Suppe, J., Ma, Y.S., Liu, B., Chen, Y.G.: Along-strike variation of the frontal zone  
439 structural geometry of the Central Longmenshan thrust belt revealed by seismic reflection profiles:  
440 Tectonophysics, 580: 178-191, 2012.



- 441    McClay, K. R., Whitehouse, P. S.: Analog Modeling of Doubly Vergent Thrust Wedges // McClay, C. R.,  
442    Thrust tectonics and hydrocarbon systems: AAPG Memoir, 82, 184-206, 2004.
- 443    Niforoushan, F., Koyi, H.A., Swantesson, J.O.H., Talbot, C.J.: Effect of basal friction on surface and  
444    volumetric strain in models of convergent settings measured by laser scanner: Journal of Structural  
445    Geology, 30, 366-379, 2008.
- 446    Niforoushan, F., Pysklywec, R., Cruden, A.: Sensitivity analysis of numerical scaled models of  
447    fold-and-thrust belts to granular material cohesion variation and comparison with analog experiments:  
448    Tectonophysics, 526-529, 196-206, 2012.
- 449    Paola, C., Staub, K., Mohrig, D., Reinhardt, L.: The “unreasonable effectiveness” of stratigraphic and  
450    geomorphic experiments: Earth-Science Reviews, 7, 1-43, 2009.
- 451    Santimano, T., Rosenau, M., Oncken, O.: Intrinsic versus extrinsic variability of analogue sand-box  
452    experiments – Insights from statistical analysis of repeated accretionary sand wedge  
453    experiments: Journal of Structural Geology, 75: 80-100, 2015.
- 454    Schreurs, G., Buiters, S., Boutelier, J., Burberry, C., Callot, J., Cavozi, C., Cerca, M., Chen, J.H., Cristallini,  
455    E., Cruden, A., Cruz, L., Daniel, J., Poian, G., Garcia, V., Gomes, C., Grall, C., Guillot, Y., Guzman, C.,  
456    Hidayah, T., Hilley, G., Klinkmüller, M., Koyi, H., Liu, C., Maillot, B., Meriaux, C., Nilfouroushan, F.,  
457    Pan, C., Pillot, D., Portillo, R., Rosenau, M., Schellart, W., Schlische, R., Take, A., Vendeville,  
458    B., Vergnaud, M., Vettori, M., Wang S, Withjack, M., Yagupsky, D., Yamada, Y.: Benchmarking  
459    analogue models of brittle thrust wedges: Journal of Structural Geology, 92: 116-139, 2016.
- 460    Sherhati, S., Molinaro, M., De Lamotte, D.F., Letouzey, J.: Detachment folding in the central and eastern  
461    Zagros fold-belt, Iran; salt mobility, multiple detachments and late basement control: Journal of  
462    Structural Geology, 27: 1680-1696, 2005.

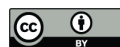

- 463 Sherkati, S., Letouzey, J, De Lamotte, D.F.: Central Zagros fold-thrust belt (Iran): new insights from  
464 seismic data, field observation, and sandbox modeling: *Tectonic*, 25, doi: 10.1029/2004TC001766,  
465 2006.
- 466 Stockmal, G. S., Beaumont, C., Nguyen, M., Lee, B.: Mechanics of thin-skinned fold-and-thrust belts:  
467 insights from numerical models. *GSA special paper* 433, 63-98, 2007.
- 468 Storti, F., Salvini, F., McClay, K.: Synchronous and velocity-partitioned thrusting and thrust polarity  
469 reversal in experimentally produced, doubly-vergent thrust wedges: implications for natural orogens:  
470 *Tectonics*, 19 (2), 378-396, 2000.
- 471 Souloumiac, P., Maillot, B., Leroy, Y.M.: Bias due to side wall friction in sand box experiments: *Journal of*  
472 *Structural Geology*, 35, 90-101, 2012
- 473 Teixell, A., Koyi, H.A.: Experimental and field study of the effects of lithological contrasts on  
474 thrust-related deformation: *Tectonics*, 22(5), doi:10.1029/2002TC001407, 2003.
- 475 Zar, J. H.: *Biostatistical Analysis*, fifth edition: Pearson Prentice-Hall, New Jersey, 2010.
- 476

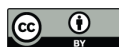

477 **Figure Captions**

478 **Fig.1 Physical characteristics of quartz sand and glass bead used in the experiments. Upper and**  
479 **lowermost pictures are SEM images, respectively.**

480 **Fig.2. Shear stress plotted as a function of cell displacement (~the amount of shear strain) for quartz**  
481 **sands (X1 and X2) and glass beads (B1 and B2) for six different normal loads (500, 1000, 2000, 4000, 8000**  
482 **and 16000 Pa).**

483 **Fig.3. Ring-shear test data analysis (four sets of materials): on the left is linear regression analysis of**  
484 **shear strength (peak, dynamic, reactivation) vs. normal load data pairs (18 data); on the right is**  
485 **histograms of friction coefficients and cohesion derived from mutual two-point regression analysis (135**  
486 **data).**

487 **Fig.4 Photographs of six experiments and their interpretations. Setups 1 and 4 are of quartz sands with**  
488 **mean grain sizes of 0.54 mm and 0.34 mm, respectively, setups 2-3, and setups 5-6 are of quartz sand and**  
489 **glass bead. The interpretation suggests significant change in structures due to the presence of glass beads**  
490 **in the model setup.**

491 **Fig.5 Plot of the wedge slope angle of accretionary wedge versus shortening displacement. The slope angle**  
492 **decreases episodically with the formation of a new thrust in each model, however, it remains roughly**  
493 **constant after attaining critical wedge at 100-150 mm shortening.**

494 **Fig.6 Plot of geometries (e.g., the wedge length and height) of accretionary wedge versus shortening**  
495 **displacement. The wedge geometries show significant changes in wedge length and height with increasing**  
496 **shortening velocities. The length increases episodically with the formation of new thrust in each model,**  
497 **however, angle and height remain roughly constant after attaining a critical wedge.**

498 **Fig.7 Topography lines are depicted in the models for each 2 cm of shortening.**



499 **Fig.8 Fault spacing and displacement to show different kinematics in the models, ( $D_{(T1/T2)}$  indicates the**  
500 **fault spacing between the forward thrust T1 and T2).**

501 **Fig.9 Plots showing the (a) p value (ANOVA test) and (b)  $R^2$  (ANOVA test) and (c) coefficient of variation**  
502 **for each setups.**

503 **Tables**

504 **Table 1 Physical characteristics of tested granular materials**

505 **Tables 2 Geometries of accretionary wedges with tested materials**



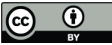

Table 1 Physical characteristics of tested granular materials

| Sample No. | Grain size<br>mm | Mean<br>grain size<br>mm | Density<br>g/cm <sup>3</sup> | Grain<br>sorting | Shape factors       |                 | Dynamic                 |        |                     | Reactivation            |        |                     | Peak                    |        |
|------------|------------------|--------------------------|------------------------------|------------------|---------------------|-----------------|-------------------------|--------|---------------------|-------------------------|--------|---------------------|-------------------------|--------|
|            |                  |                          |                              |                  | Angular<br>/rounded | Aspect<br>ratio | Friction<br>coefficient | Angle  | Coefficient<br>(Pa) | Friction<br>coefficient | Angle  | Coefficient<br>(Pa) | Friction<br>coefficient | Angle  |
| DB2017-X1  | 0.3-0.45         | 0.543                    | 1.43                         | MW               | A                   | 1.54            | 0.599                   | 30.922 | 68.527              | 0.687                   | 34.489 | 101.630             | 0.783                   | 38.061 |
| DB2017-X2  | 0.2-0.3          | 0.342                    | 1.35                         | MW               | A                   | 1.56            | 0.582                   | 30.199 | 92.299              | 0.656                   | 33.265 | 124.949             | 0.798                   | 38.590 |
| DB2017-B1  | 0.3-0.45         | 0.448                    | 1.37                         | M                | R                   | 1.34            | 0.459                   | 24.655 | 16.001              | 0.530                   | 27.924 | 28.516              | 0.594                   | 30.710 |
| DB2017-B2  | 0.2-0.3          | 0.371                    | 1.48                         | MW               | R                   | 1.36            | 0.493                   | 26.243 | 37.014              | 0.569                   | 29.640 | 71.082              | 0.612                   | 31.467 |

Tables 2 Geometries of accretionary wedges with tested materials

| Setup | Materials    | Wedge<br>height (mm) | Wedge length<br>(mm) | Wedge taper<br>(°) | Fault numbers<br>(n) | Fault spacing<br>(mm) |
|-------|--------------|----------------------|----------------------|--------------------|----------------------|-----------------------|
| No.1  | X1           | 135.3                | 292.6                | 18.7               | 8                    | 8.2~110.2             |
| No.2  | X1+B2 (1 mm) | 101.9                | 375.1                | 10.3               | 10                   | 12.6~73.5             |
| No.3  | X1+B2 (3 mm) | 102.0                | 349.3                | 9.8                | 5                    | 224~108.1             |
| No.4  | X2           | 124.0                | 302.2                | 17.5               | 9                    | 5.6~95.0              |
| No.5  | X2+B1 (1 mm) | 122.2                | 328.6                | 16.5               | 10                   | 11.6~49.6             |
| No.6  | X2+B1 (3 mm) | 106.8                | 327.3                | 12.2               | 7                    | 14.8~93.1             |

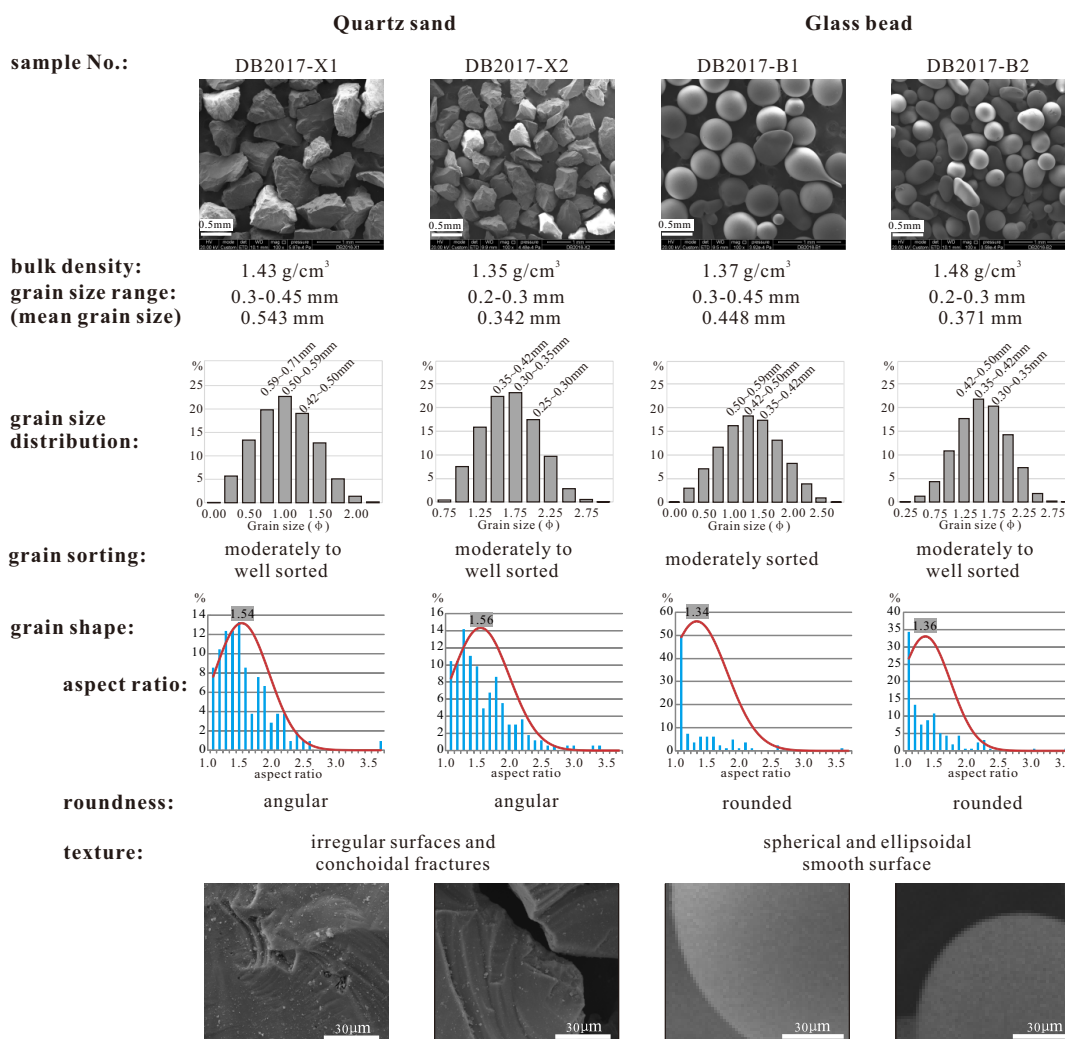

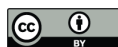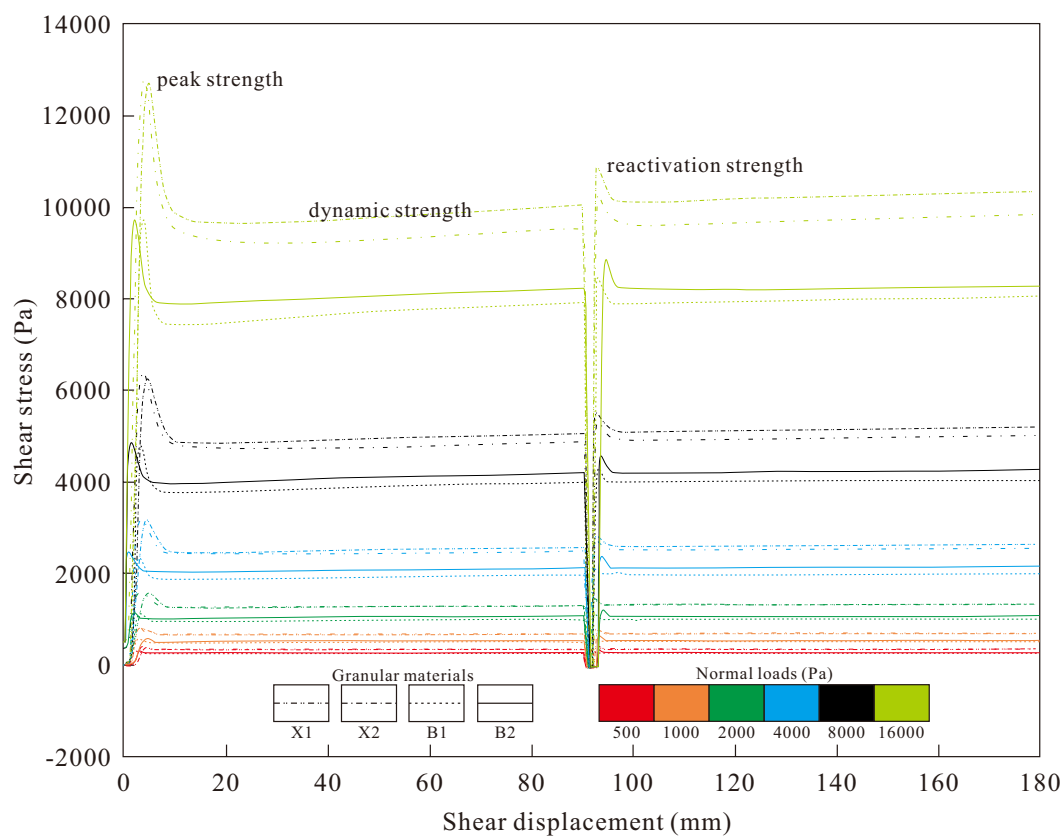



Linear regression based on 18 measurements

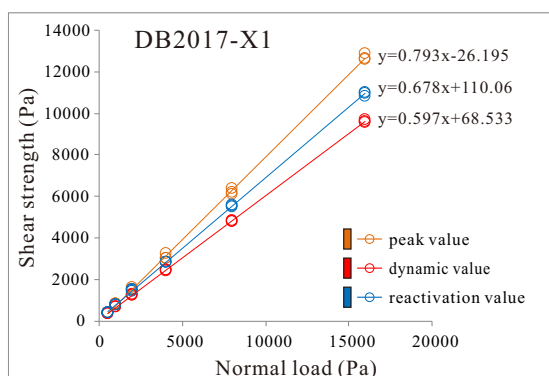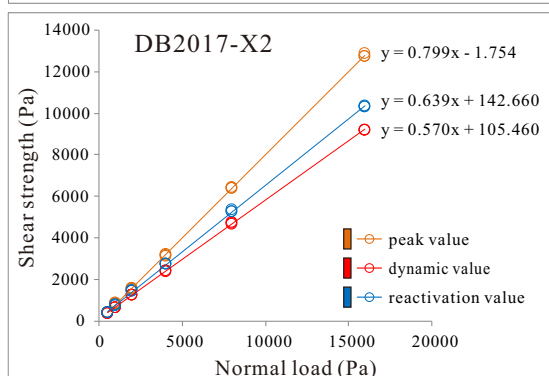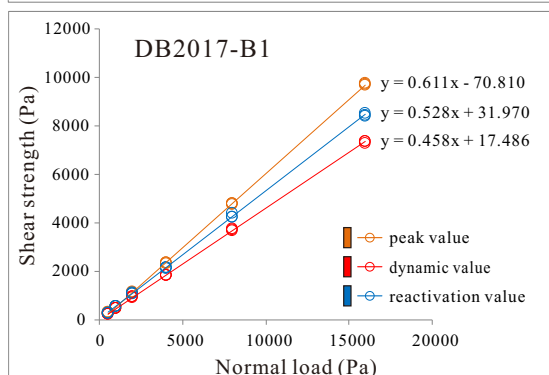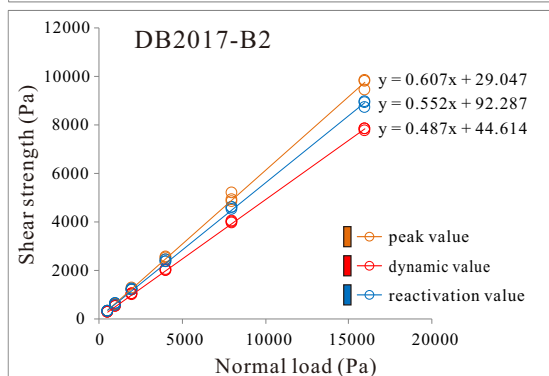

Friction coefficient &amp; cohesion based on 135 mutual linear regressions (green=normal distribution)

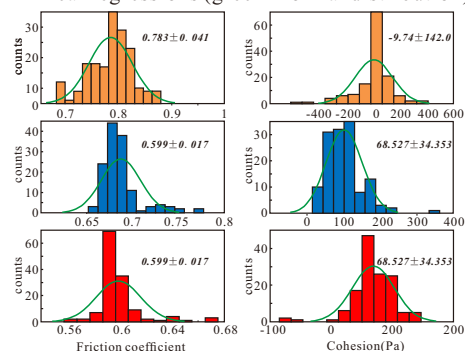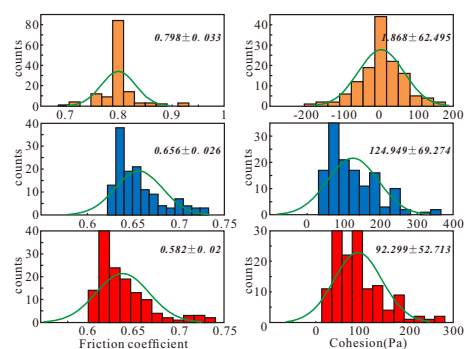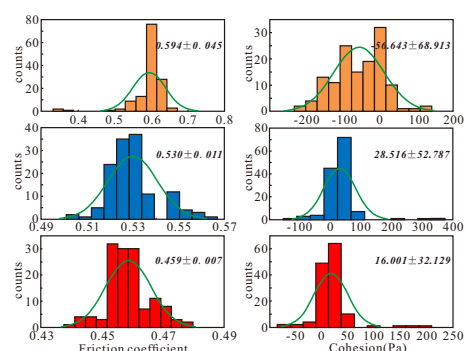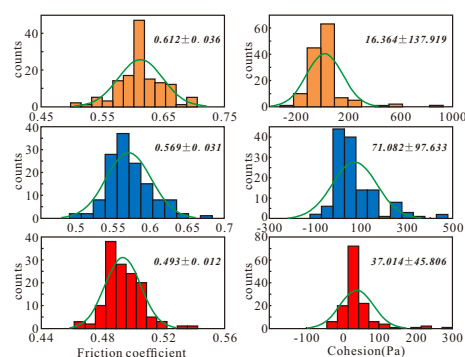

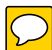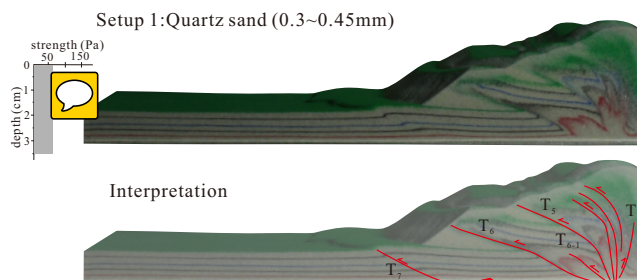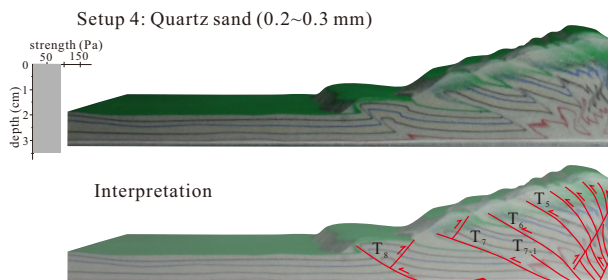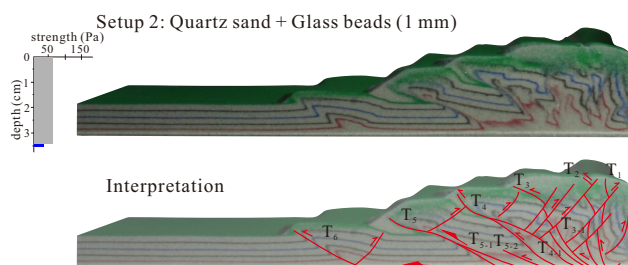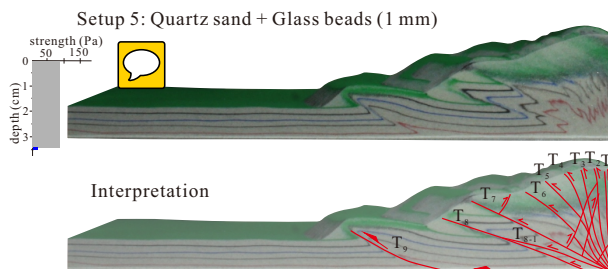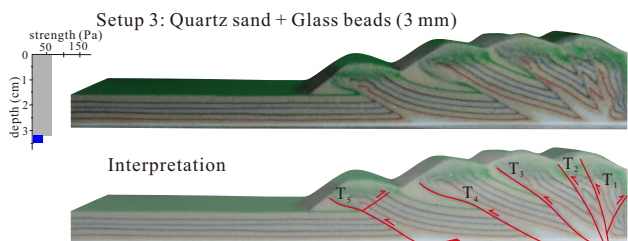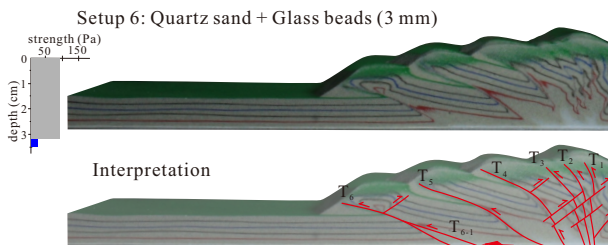

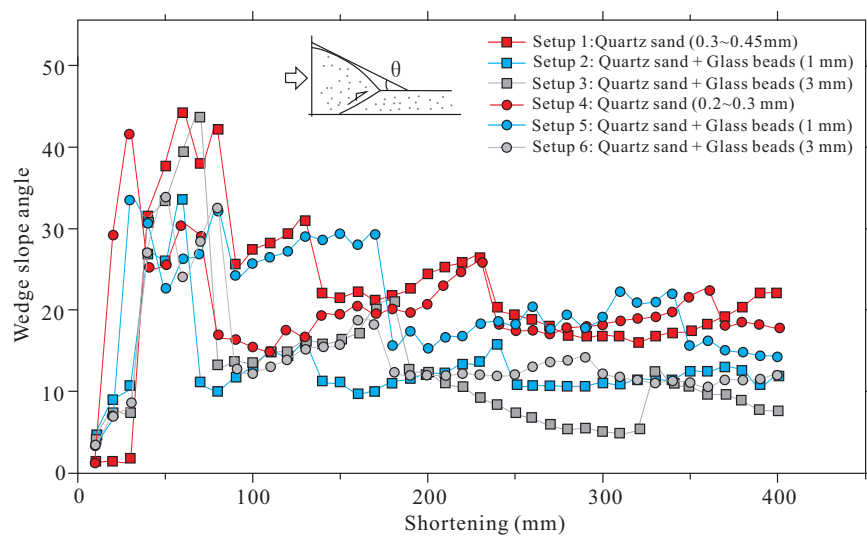

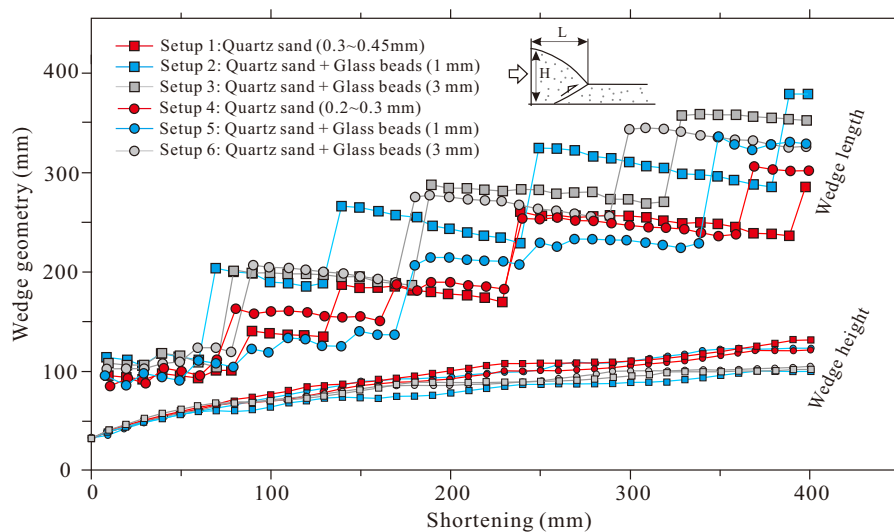

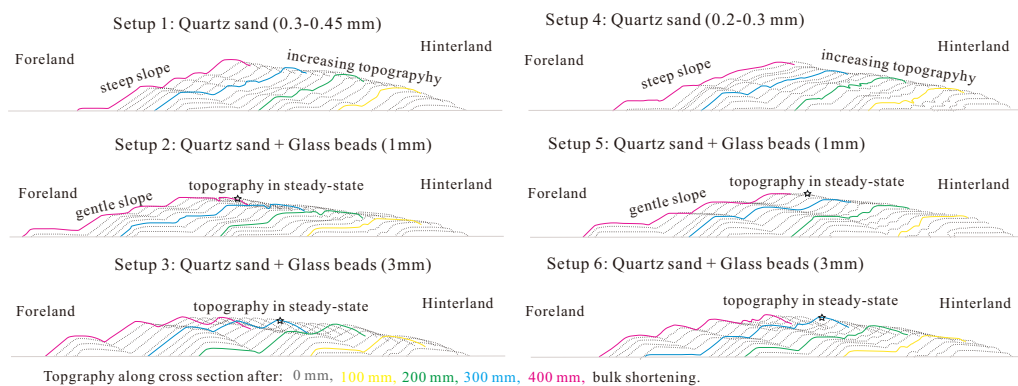



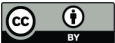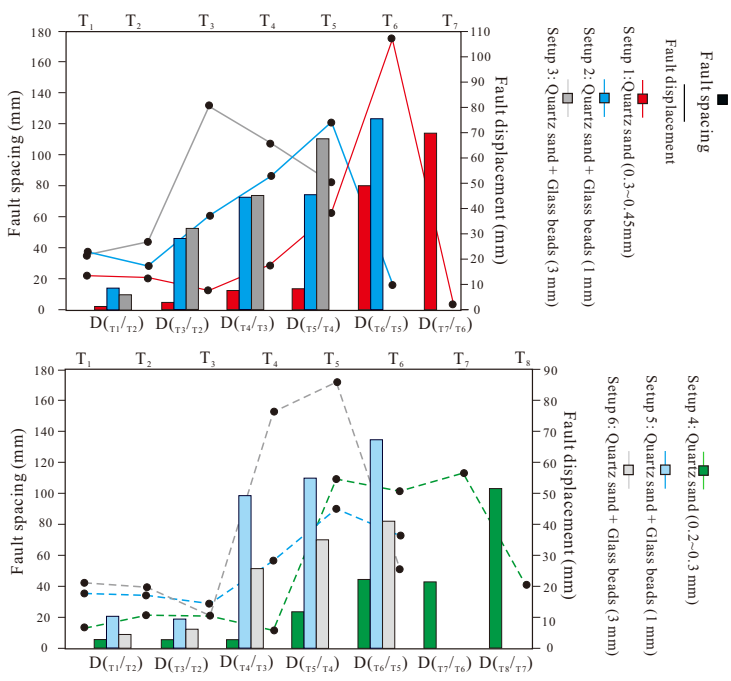

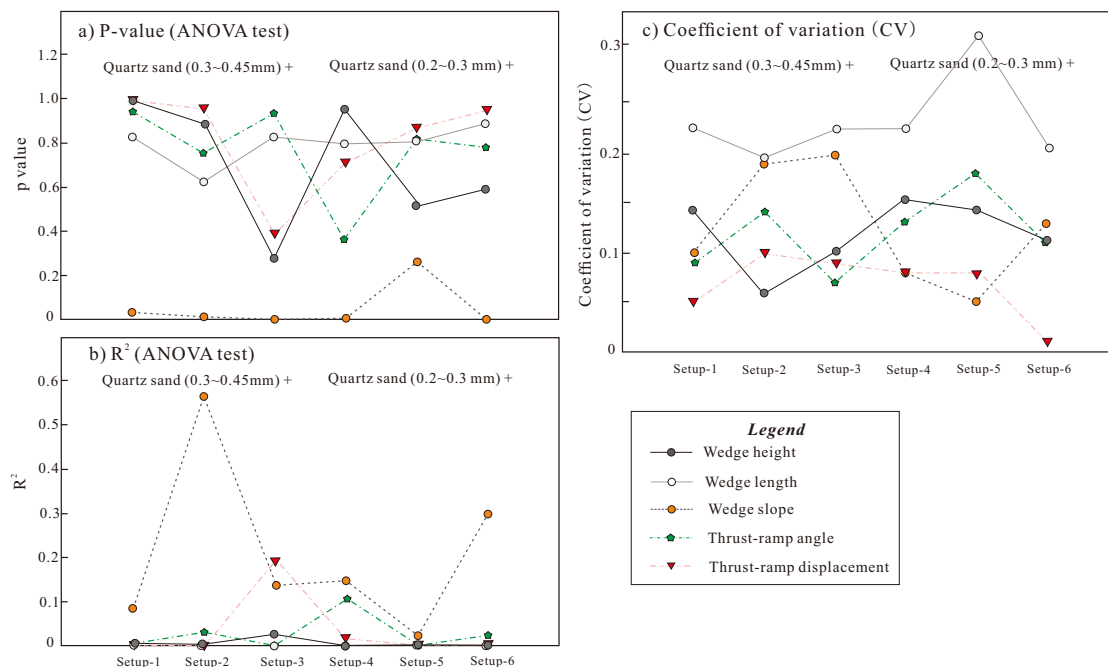

Supplement: Supplementary file [file se-2018-45-RC2-supplement.pdf]
