# Supplementary material for: To what degree the geometry and kinematics of accretionary wedges in analogue experiments is dependent on material properties
Source: Copernicus journal article supplement (doi:10.5194/se-2018-45), 2018-07-03

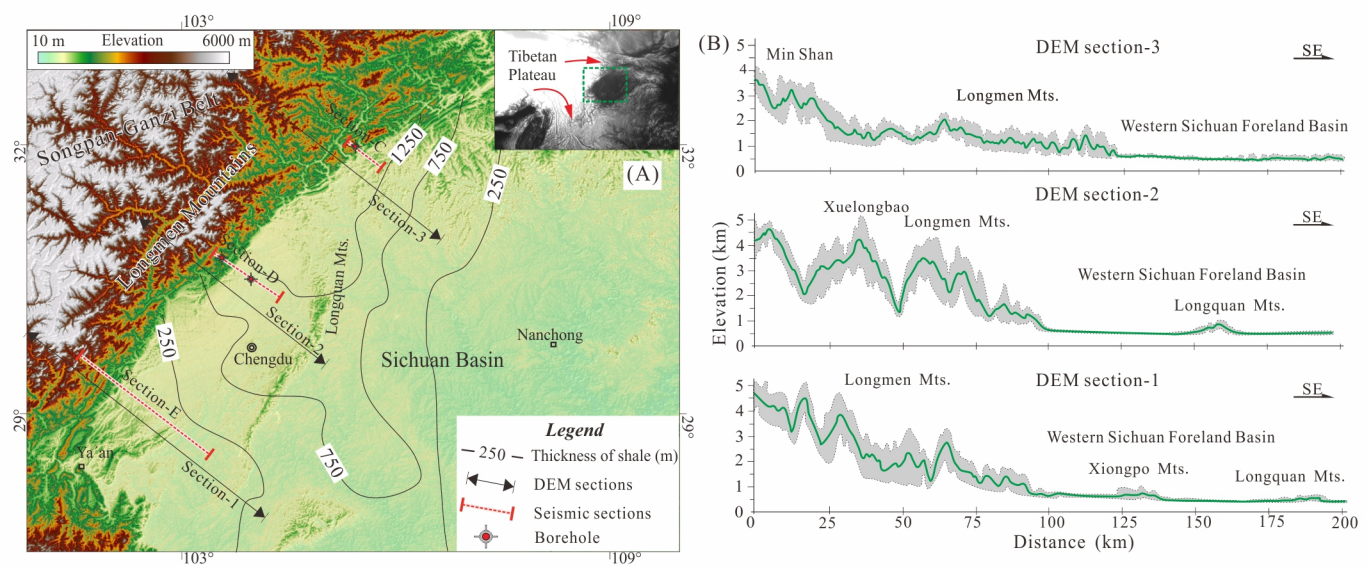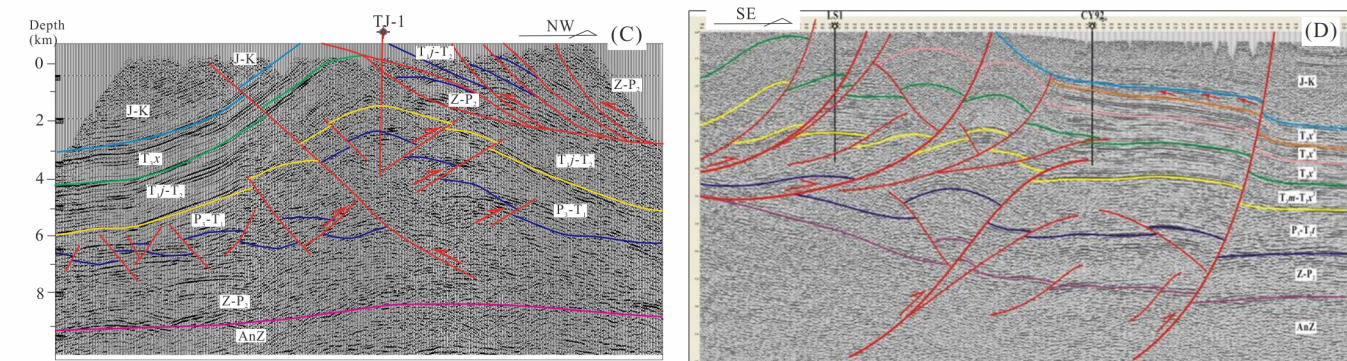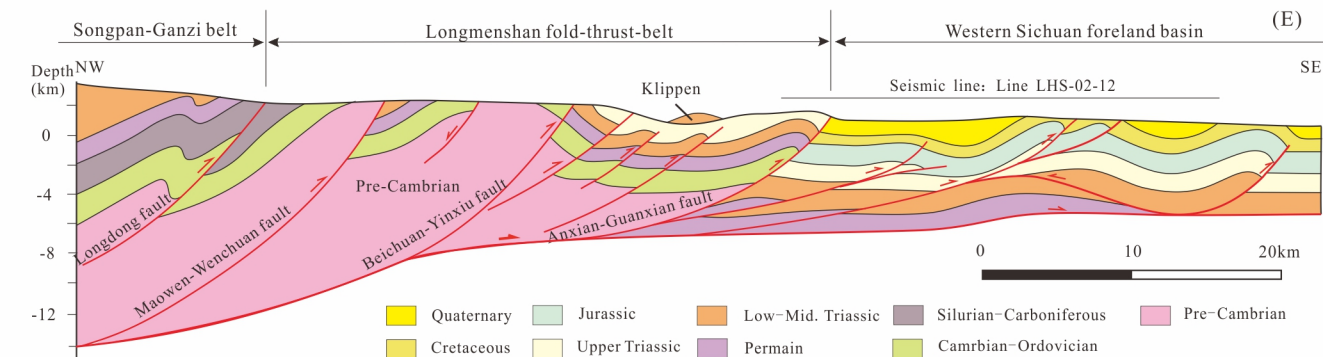

Supplement: Supplementary file [file se-2018-45-AC2-supplement.pdf]
