# Supplementary material for: To what degree the geometry and kinematics of accretionary wedges in analogue experiments is dependent on material properties
Source: Copernicus journal article supplement (doi:10.5194/se-2018-45), 2018-07-03
Supplement: Supplementary file [file se-2018-45-SC1-supplement.pdf]

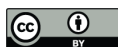

67 falling within the 0.4-0.7 mm, and 0.25-0.4 mm fractions. Two sets of glass bead, i.e., the DB2017-B1  
68 and B2 have a less homogeneous grain size distribution, with about 50% of the grains falling within  
69 the 0.35-0.6 mm, and 0.3-0.5 mm fractions. The two sets of quartz sand show consistence between the  
70 bulk density and grain size. Samples with the larger grains have higher densities, but the glass beads  
71 are not in this situation.

72 There is no distinct difference in grain sorting between the quartz and glass beads sand. The  
73 grain sorting of all materials varies from moderately to well sorted. Furthermore, we quantified the  
74 shape of grains using SEM photographic images following the methods of Klinkmuller et al. (2016).  
75 Grain shape and outline were measured and averaged from more than 60 grains of each material. The  
76 aspect ratio of four sets of materials varies from 1.34 to 1.56, of which two sets of quartz sand are  
77 characteristics with 1.54 and 1.56, respectively, and two sets glass bead are 1.34 and 1.36, indicating  
78 better grain shape of the latter, as well as of their textures.

### 79 2.3 Mechanical behaviour of materials

80 The mechanical properties of the friction materials were determined using Schulze ring-shear  
81 tester at the GFZ in Potsdam, at low confining pressures (0.1-10 kPa) and low shear velocities, similar  
82 to those observed in analogue experiments (Lohrmann et al., 2003; Klinkmuller et al., 2016). The  
83 tester consists of a shear cell containing the frictional materials and a lid, the latter is pressed on the  
84 material at given normal load that is constant throughout an experiment. There are sensors at the lid  
85 recording the torque, which can be transformed into shear stress. Ring-shear measurements are  
86 performed at a shear velocity of 3 mm/min for 4 min at a given normal load.

87 The shear stresses of four sets of materials are shown in Fig.2, indicating of varied frictional  
88 properties. At the onset of deformation shear stress increases quickly from zero to a peak level within

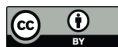

89 a few millimetres of shear (strain hardening phase), and then drops to a stable value (strain softening  
90 phase) that retains for the rest of the deformation until to formation of a shear zone (sliding phase).  
91 When deformation is stopped, the sample unloaded and subsequently deformation is resumed.  
92 Renewed shearing results in a second and similar shear curve, resulting in another stress peak  
93 (reactivation phase). That is distinctly smaller than the first peak level, and roughly larger than the  
94 value of the first stable phase (*Fig.2*). It should be noted that the slightly increased values are artifact  
95 of the setup, result of the fact that the lid of shear cell slowly burrows into the tested materials during  
96 shearing, thereby increasing the friction at its side walls (*Lohrmann et al., 2003*). Furthermore, three  
97 values of friction strengths, e.g., peak strength, dynamic strength and reactivation strength, are picked  
98 manually from these curves, for the applied normal load. For each material, the three values of friction  
99 strengths, e.g., peak strength, dynamic strength and reactivation strength, are determined for six  
100 different normal loads varying between 500 Pa and 16000 Pa. Each normal load step is repeated three  
101 times, resulting in a total of 18 measurements for each material.

102 Measured values of peak strength, dynamic strength and reactivation strength are plotted against  
103 the applied normal stresses, respectively (*Fig.3*). All four sets of materials show an approximately  
104 linear increase of all three values with normal stresses, consistent with a Mohr-Coulomb failure  
105 criterion. Thus, a linear regression analysis is applied to the three values of all materials, to obtain  
106 their friction coefficient ( $\mu$ ), which corresponds to the slope of the line and the friction angle ( $\tan^{-1} \mu$ ).  
107 Furthermore, the cohesion ( $C$ ) is the linearly extrapolated value at zero normal stress (*Table 1*). It  
108 should be noted that the failure envelopes for frictional materials is usually non-linear at low normal  
109 stresses. We use further an alternative method to derive friction coefficients and related cohesion of  
110 four sets of materials. This method calculates two point slopes and their intercepts for mutually



111 combined pairs of a data set (e.g., *Klinkmuller et al., 2016*). A total of 18 measurements for each  
112 material thus resulted into 135 data sets for friction coefficient and cohesion. Those are then evaluated  
113 by means of calculating mean and standard deviation and comparing the probability density function  
114 to a normal distribution (*Fig.3*).

115 For the data sets obtained by two methods of the linear regression and mutual pairs regression  
116 analysis, we have found a slight difference between them. (1) peaks of the experimental probability  
117 density function are close to or narrower than a normal distribution. (2) cohesion values from the  
118 mutual pairs regression analysis are usually smaller than the values from the linear regression analysis.  
119 We thus prefer the calculated standard deviation as a conservative value for the four sets of frictional  
120 materials (*Table 1*).

121 For all the four sets of material, there is a systematic decrease in the values of friction coefficient  
122 from internal peak friction to internal reactivation friction, to internal dynamic friction (*Fig.3*). At the  
123 same way, the angles of them systematically decrease with 2-5 °by turn (*Table 1*). Internal peak  
124 friction angles are 38 °for two sets of quartz sand, with friction coefficients of 0.783 and 0.798 (e.g.,  
125 DB2017-X1 and X2), respectively. Glass beads have much lower angles of internal peak friction of  
126 31 °, and friction coefficients of 0.594 and 0.612 (e.g., DB2017-B1 and B2).

127 Internal reactivation friction and dynamic friction angles for sample DB2017-X1 are 34 °and 31 °,  
128 with friction coefficients of 0.687 and 0.599, respectively. For sample DB2017-X2 with much smaller  
129 grain size than the former one, those angles are 33 °and 30 °with related friction coefficients of 0.656  
130 and 0.582, indicating much smaller values than those of DB2017-X1. Two sets of glass beads have  
131 lower angles of internal reactivation friction and dynamic friction with 28 °and 25 °, 30 °and 26 °,  
132 respectively. Whilst the friction coefficients are 0.530 and 0.495, 0.569 and 0.493 for samples of

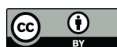

133 DB2017-B1 and B2. For the two sets of glass beads, the internal friction angles distinctly increase  
134 with the decreased mean grain size, but not in the quartz sands. It should be noted that the internal  
135 friction angles of glass beads are substantially smaller than that of quartz sands, no matter of their  
136 mean grain size.

137 The extrapolated cohesion values of internal peak friction, reactivation friction and dynamic  
138 friction vary considerably, in particular the internal peak friction. Sample DB2017-X1 is characterized  
139 by roughly similar cohesion values of reactivation friction and dynamic friction, e.g., 68 Pa,  
140 significantly larger than that of internal peak friction with -9 Pa. For sample DB2017-X2, the  
141 cohesion values of internal reactivation friction and dynamic friction are 125 Pa and 92 Pa, in contrast  
142 to peak 2 Pa of cohesion values at internal peak friction. Extrapolated cohesion values of glass beads  
143 are distinctly smaller than that of poor quartz sand (*Fig.3*). The cohesion values of internal  
144 reactivation friction and dynamic friction are 28 Pa and 16 Pa, 71 Pa and 37 Pa (e.g., DB2017-B1 and  
145 DB2017-B2), respectively. In the four sets of materials, the cohesion value of reactivation friction is  
146 highest, whilst the peak friction is the lowest.

147 *Klinkmuller et al. (2016)* used the same ring-shear tester to determine the material properties of  
148 frictional materials widely used in more than twenty laboratories worldwide. The obtained values  
149 correspond closely to ours, with internal friction angles of 32-40 ° at peak friction, and mean values of  
150 30-37 °, 28-34 ° at reactivation friction and at dynamic friction, respectively. Most of their values of  
151 friction coefficient at dynamic friction and reactivation friction are roughly equal, and substantially  
152 smaller than that at peak friction.

### 153 3 Experiment setup and results

#### 154 3.1 Experiment setup
